# Supplementary material for: Controlling the reactivity of phthalonitriles for the efficient synthesis of chiral phthalocyanines with self-assembly abilities
Source: Royal Society of Chemistry journal article supplement (doi:10.1039/d3qo01630g), 2023-11-09
Supplement: d3qo01630g1.pdf [file d3qo01630g1.pdf]

Supporting Information

**Controlling the reactivity of phthalonitriles for the efficient synthesis of  
chiral phthalocyanines with self-assembly abilities**

Irene Paramio, Tomás Torres and Gema de la Torre\*

I. Paramio, T. Torres, G. de la Torre

*Department of Organic Chemistry, Universidad Autónoma de Madrid*

*C/ Francisco Tomás y Valiente 7, 28049-Madrid, Spain*

*E-mail: Irene.paramio@uam.es; tomas.torres@uam.es; gema.delatorre@uam.es*

T. Torres, G. de la Torre

*Institute for Advanced Research in Chemical Sciences (IAdChem). Universidad Autónoma de Madrid, 28049, Madrid, Spain*

T. Torres

*Instituto Madrileño de Estudios Avanzados (IMDEA)-Nanociencia. C/ Faraday 9, Cantoblanco, 28049, Madrid, Spain*

**Table of Contents**

|                                                                                             |     |
|---------------------------------------------------------------------------------------------|-----|
| 1. General Information.....                                                                 | S2  |
| 2. Study of the cyclotetramerization reaction conditions.....                               | S3  |
| <b>Table S1:</b> of bisphthalonitriles                                                      | S3  |
| AA.....                                                                                     |     |
| <b>Table S2:</b> between AA and B under MW irradiation.....                                 | S3  |
| 3. Experimental procedures and characterization data.....                                   | S4  |
| <b>3.1</b> General procedure for the synthesis of AABB and (AA) <sub>2</sub> Zn(II)Pcs..... | S4  |
| <b>3.2</b> Synthesis of (AA) <sub>2</sub> -1 and AABB-4.....                                | S4  |
| <b>3.3</b> Synthesis of (AA) <sub>2</sub> -2 and AABB-3.....                                | S4  |
| <b>3.4</b> Synthesis of 4.....                                                              | S5  |
| <b>3.5</b> Synthesis of 5.....                                                              | S5  |
| <b>3.6</b> Synthesis of 1.....                                                              | S5  |
| 4. NMR spectra.....                                                                         | S6  |
| 5. MS and HR-MS analysis.....                                                               | S17 |
| 6. UV-Vis absorption and emission spectra.....                                              | S25 |
| 7. DLS analysis of nanoparticles.....                                                       | S27 |
| 8. Cartesian coordinates for the optimized structures.....                                  | S28 |
| 9. References.....                                                                          | S37 |

## 1. General Information

All chemical reagents and solvents were analytical grade and were used without further purification. All reactions were performed in standard glassware, except for the cyclotetramerization reactions that were carried out in high pressure sealed tubes. Analytical TLC was carried out employing aluminum sheets coated with silica gel type 60 F254 (0.2 mm thick, E. Merck). Purification and separation of the synthesized products was performed by column chromatography, using silica gel (230–400 mesh, 0.040-0.063 mm, Merck). Eluents and relative proportions of the solvents are indicated for each particular case. Size exclusion chromatography was performed using Bio-Beads S-X1 (200-400 mesh, Bio-Rad). Anion exchange was performed using of Dowex<sup>®</sup> resin. Mass Spectrometry (MS) and HighResolution Mass Spectrometry (HRMS) spectra were recorded employing Electrospray Ionization (ESI Positive TOF\_MS) mass spectra using an API Q-Star Pulsar i from Sciex, or Matrix Assisted Laser Desorption/Ionization-Time of Flight (MALDI-TOF) using a Bruker Ultraflex III TOF/TOF spectrometer, with a nitrogen laser operating at 337 nm, or with a NdYAG laser operating at 335 nm. The different matrixes employed are indicated for each spectrum. Mass spectrometry data are expressed in m/z units. All MS experiments were carried out at the Servicio Interdepartamental de Investigación (SIdI) of the Universidad Autónoma de Madrid. <sup>1</sup>H NMR and <sup>13</sup>C NMR were recorded on Bruker XRD-300 (300 MHz) and XRD-500 (500 MHz) instruments. Deuterated solvents employed are indicated in each spectrum. Compounds **AA-1**,<sup>2</sup> **AA-2**<sup>2</sup> and **2**<sup>3</sup> were prepared following reported procedures.

### Spectroscopic and photophysical characterization

UV-vis spectra were recorded on a JASCO-V660 UV-vis spectrophotometer using spectroscopic grade solvents. Absorption coefficients were derived from the slopes of Lambert-Beer plots using solutions from 1.5 μM to 6 μM. Fluorescence spectra were recorded with a JASCO FP-8600 spectrophotometer using spectroscopic grade solvents. UV-Vis and fluorescence measurements were performed using 10 x 10mm quartz cuvettes with a Jasco Peltier ETCS-761 temperature controller incorporated keeping temperature constant at 20°C. Circular dichroism spectra were recorded on a JASCO J-815 CD-spectrometer including a Jasco Peltier ETCT-762 temperature controller using spectroscopic grade solvents and 10 x 10mm quartz cuvettes. Fluorescence spectra for determining fluorescence quantum yield ( $\Phi_F$ ) were performed using a Fluorolog-3 (FL3-iHR) spectrophotometer (HORIBA JobinYvon).  $\Phi_F$  was determined by means of Equation 1, comparing the integrated fluorescent intensity of optically matched solutions between sample (S) and reference (R) ZnPc in DMSO ( $\Phi = 0.20$ ).<sup>1</sup> The samples were excited at 630 nm.

$$\Phi_F = \frac{Area(S)}{Area(R)} \times \frac{Abs(R)}{Abs(S)} \times \frac{n^2(S)}{n^2(R)} \times \Phi_R$$

Eq. 1

### Characterization of nanoaggregates

Samples were imaged using a microscope JEOL JEM 1400 plus from ICTS - Centro Nacional de Microscopía Electrónica, UCM. Samples were prepared over Carbon Film 200 Mesh, CF200-CU grids, with glow-discharge treatment. Solutions were prepared, filtered, sonicated 10 minutes, and left to stand overnight. Dynamic Light Scattering (DLS) measurements were performed in a Malvern Zetasizer Nanoseries Nano-ZS, using quartz cuvettes (1cm). All solutions were prepared using MilliQ water.

### Computational method

All the DFT calculations were carried out by employing Gaussian13 software using B3LYP/6-31G(d) level of theory. The counterions of **1** were excluded in the calculations to save

computational cost.

## 2. Study of the cyclotetramerization reaction conditions

**Table S1.** Study of the cyclotetramerization reaction conditions of bisphthalonitriles **AA**

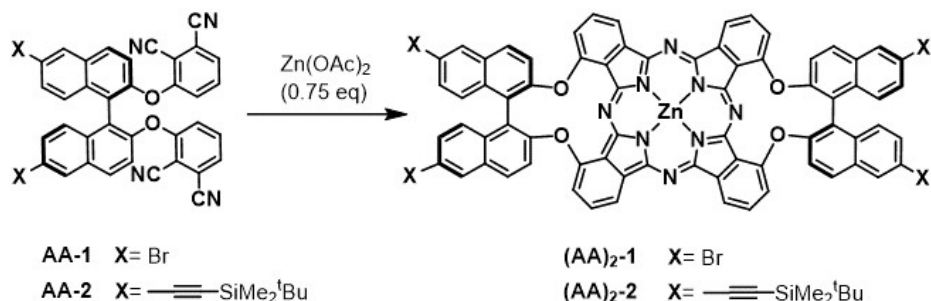

| Entry          | AA (eq) | Solvent ([AA]=0.05M) | T (°C) | Time (h) | (AA) <sub>2</sub> (%) <sup>a</sup> |
|----------------|---------|----------------------|--------|----------|------------------------------------|
| 1              | 1 (1.0) | o-DCB/DMF (2:1)      | 150    | 16       | 2                                  |
| 2              | 2 (1.0) | o-DCB/DMF (2:1)      | 150    | 16       | 7                                  |
| 3              | 1 (1.0) | DMAE                 | 120    | 16       | 3                                  |
| 4              | 1 (1.0) | DMAE/LiOMe (0.5eq)   | 120    | 16       | 4                                  |
| 5 <sup>b</sup> | 1 (1.0) | o-DCB/DMF (2:1)      | 150    | 2        | 3                                  |
| 6 <sup>b</sup> | 1 (1.0) | DMAE                 | 130    | 1        | 3                                  |
| 7 <sup>b</sup> | 1 (1.0) | DMAE                 | 130    | 2        | 3                                  |
| 8 <sup>b</sup> | 1 (1.0) | DBU/1-pentanol (1:1) | 150    | 0.5      | 4                                  |

<sup>a</sup> Isolated yield after purification through flash column chromatography. <sup>b</sup> Reactions performed under MW irradiation.

**Table S2** Study of the cross-cyclotetramerization reaction conditions between **AA** and **B** under MW irradiation.

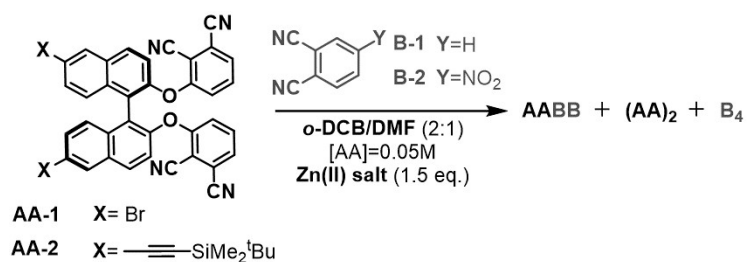

| Entry | AA (eq) | B (eq)  | T (°C) | Time (h) | (AA) <sub>2</sub> (%) | AABB (%)       |
|-------|---------|---------|--------|----------|-----------------------|----------------|
| 1     | 1 (1.0) | 1 (2.0) | 150    | 2        | 2                     | 15             |
| 2     | 1 (1.0) | 2 (2.0) | 150    | 2        | 5                     | - <sup>a</sup> |
| 3     | 2 (1.0) | 2 (2.0) | 150    | 2        | 3                     | 2              |

<sup>a</sup> AABB-4 not isolated from the reaction mixture due to solubility issues

### 3. Experimental procedures and characterization data

**3.1 General procedure for the synthesis of AABB and (AA)<sub>2</sub> Zn(II)Pcs:** Bisphthalonitrile **AA** (1 eq.), phthalonitrile **B** (2 eq.) and anhydrous Zn(AcO)<sub>2</sub> (1.5-2 eq.) were placed in a 5 mL high pressure resistant flask equipped with a magnetic stirrer, and then dry *o*-dichlorobenzene/DMF (dried over 4Å molecular sieves) 2:1 were added, for [AA]=0.05 M. The mixture was heated to 150-160°C overnight under argon atmosphere. After cooling, the solvent was removed under vacuum. The mixture of products was then purified as follows.

**3.2 Synthesis of (AA)<sub>2</sub>-1 and AABB-4:** Following the general procedure, bisphthalonitrile **AA-1<sup>2</sup>** (60 mg, 0.074 mmol), phthalonitrile **B-2** (29.8 mg, 0.147 mmol) and anhydrous Zn(AcO)<sub>2</sub> (23.8 mg, 0.110 mmol). The blue solid containing a mixture of **B<sub>4</sub>-2**, **AABB-4** and **(AA)<sub>2</sub>-1** was purified by flash column chromatography (heptane:THF 1:1). The first eluted product was **(AA)<sub>2</sub>-1** as a blue solid. The solid was washed with MeOH and isolated in a 14% yield (8.8 mg). **<sup>1</sup>H-NMR** (500 MHz, Pyridine-d<sub>5</sub>): δ 9.62-9.54 (m, 4H, H<sub>Ar</sub>), 8.26-8.19 (m, 4H, H<sub>Ar</sub>), 8.15 (s, 4H, H<sub>Ar</sub>), 8.03-7.97 (m, 8H, H<sub>Ar</sub>), 7.94-7.86 (m, 4H, H<sub>Ar</sub>), 7.83-7.80 (d, J = 9.0 Hz, 4H, H<sub>Ar</sub>), 7.79-7.69 (m, 4H, H<sub>Ar</sub>) ppm. **<sup>13</sup>C NMR** (126 MHz, Pyridine-d<sub>5</sub>): δ 156.5, 154.3, 153.3, 142.6, 140.0, 134.5, 131.9, 131.6, 131.3, 131.1, 129.4, 128.3, 126.5, 126.3, 121.5, 119.9, 118.5, 115.8 ppm. **HR-MS:** MALDI (ULTRAFLEX III); DCTB + PPGNa 1000 + PPGNa 2000; 1451.8566 (calculated for C<sub>72</sub>H<sub>32</sub>Br<sub>4</sub>N<sub>8</sub>O<sub>4</sub>Zn); 1451.8524 (experimental). **IR(ATR)** ν<sup>-1</sup> (cm<sup>-1</sup>): 1577, 1483, 1330, 1267, 1260, 1198, 1103. **UV-Vis** (THF) log(ε/M<sup>-1</sup>cm<sup>-1</sup>) (λ): 4.5 (345 nm); 4.2 (613 nm); 5.0 (684 nm). **Fluorescence:** λ<sub>maximum</sub> = 693 nm; λ<sub>excitation</sub> = 674 nm.

**3.3 Synthesis of (AA)<sub>2</sub>-2 and AABB-3:** Following the general procedure: Bisphthalonitrile **AA-2<sup>2</sup>** (60 mg, 0.074 mmol), phthalonitrile **B-2** (25.5 mg, 0.147 mmol) and anhydrous Zn(AcO)<sub>2</sub> (20.3 mg, 0.110 mmol). The blue solid containing a mixture of **B<sub>4</sub>-2**, **AABB-3** and **(AA)<sub>2</sub>-2** was dissolved in THF (2 mL). The mixture was purified through a silica gel plug in THF, obtaining a mixture of **AABB-3** and **(AA)<sub>2</sub>-2**. After evaporation of the solvent under reduced pressure, the mixture was dissolved in 4 mL THF, then heptane (10 mL) was added and the precipitate that appears was separated from the solution. The precipitate was submitted to the same procedure two more times, then washed with heptane and MeOH to obtain pure **AABB-3** as a blue solid in a 4% yield (8 mg). **<sup>1</sup>H NMR** (500 MHz, DMSO-d<sub>6</sub>, 353K) δ 9.23-9.02 (m, 1H, H<sub>Ar</sub>), 9.00-8.84 (m, 1H, H<sub>Ar</sub>), 8.80-8.68 (m, 1H, H<sub>Ar</sub>), 8.65-8.42 (m, 3H, H<sub>Ar</sub>), 8.40-8.20 (m, 3H, H<sub>Ar</sub>), 8.19 – 7.55 (m, 13H, H<sub>Ar</sub>), 1.08-0.98 (m, 18H, <sup>t</sup>Bu), 0.28-0.17 (m, 12H, Si-CH<sub>3</sub>) ppm. **HR-MS:** MALDI (ULTRAFLEX III); DCTB + PPGNa 1000; 1224.2901 (calculated for C<sub>68</sub>H<sub>52</sub>N<sub>10</sub>O<sub>6</sub>Si<sub>2</sub>Zn); 1224.2896 (experimental). **UV-vis** (THF) log(ε /M<sup>-1</sup>cm<sup>-1</sup>) (λ): 4.7 (350 nm); 4.5 (639 nm); 4.9 (682 nm). **Fluorescence** (THF): λ<sub>maximum</sub> = 702 nm; λ<sub>excitation</sub> = 650 nm. The supernatant was evaporated under reduced pressure and purified by flash column chromatography (heptane/THF 3:2) obtaining **(AA)<sub>2</sub>-2** in the first eluting fraction. After washing with MeOH the blue solid was obtained in a 21% yield (13 mg). **<sup>1</sup>H-NMR** (500 MHz, Pyridine-d<sub>5</sub>): δ 9.81-9.40 (m, 4H, H<sub>Ar</sub>), 8.42-8.18 (m, 4H, H<sub>Ar</sub>), 8.14 (d, J = 9.4 Hz, 4H, H<sub>Ar</sub>), 8.09-7.93 (m, 8H, H<sub>Ar</sub>), 7.91-7.85 (m, 4H, H<sub>Ar</sub>), 7.83-7.63(m, 4H, H<sub>Ar</sub>), 1.08 (s, 36H, <sup>t</sup>Bu), 0.27 (s, 24H, Si-CH<sub>3</sub>) ppm. **<sup>13</sup>C NMR** (126 MHz, Pyridine-d<sub>5</sub>): δ 157.2, 154.3, 153.3, 142.6, 133.7, 131.5, 131.1, 130.7, 130.5, 130.3, 126.6, 126.5, 121.5, 120.0, 119.3, 115.6, 107.7 (C≡), 93.3(≡C-Si), 26.7 (<sup>t</sup>Bu), 17.4 (C-<sup>t</sup>Bu), -3.9 (Si-CH<sub>3</sub>) ppm. **HR-MS:** MALDI (ULTRAFLEX III); DCTB + PEGNa 1500; 1692.5605 (calculated for C<sub>104</sub>H<sub>92</sub>N<sub>8</sub>O<sub>4</sub>Si<sub>4</sub>Zn), 1692.5619 (experimental). **IR(ATR)** ν<sup>-1</sup> (cm<sup>-1</sup>): 2953, 2147, 1710, 1574, 1470, 1358, 1250, 1219, 1087, 825. **UV-Vis** (THF) log(ε/M<sup>-1</sup>cm<sup>-1</sup>) (λ): 4.7 (299 nm); 4.7 (349 nm); 4.4 (614 nm); 5.2 (684 nm). **Fluorescence:** λ<sub>maximum</sub> = 683 nm; λ<sub>excitation</sub> = 650 nm.

**3.4 Synthesis of 4: (AA)<sub>2</sub>-2** (17.5 mg, 0.010 mmol) was dissolved in dry THF (0.56 mL), under argon atmosphere. TBAF (purchased from Aldrich, 1 M in THF, 82.5  $\mu$ L, 0.083 mmol) was added dropwise, and the reaction was stirred for 2h at rt. After that, water (4 mL) was added. The blue precipitate was filtered off, dried and directly added to a Schlenk flask together with Pd(PPh<sub>3</sub>)<sub>4</sub> (2.4mg, 0.002 mmol) and **2**<sup>3</sup> (37.24 mg, 0.052 mmol). The mixture was dissolved in dry DMF (0.27 mL) and Et<sub>3</sub>N (0.11 mL) degassed by three freeze-pump-thaw cycles at room temperature. The reaction mixture was heated at 80 °C under argon atmosphere, and maintained under continuous stirring 45 min. The disappearance of the product was monitored by TLC in heptane/THF (2:3). After evaporation of the solvent, the product was purified by column chromatography in Bio-Beads using THF as eluent. The product was washed with heptane, obtaining **5** (10.6 mg) as a blue-green solid in a 27% yield over two steps. **<sup>1</sup>H NMR** (300 MHz, DMSO-d<sub>6</sub>)  $\delta$  9.6-7.06 (m, 32H, H<sub>Ar</sub>), 7.00-6.65 (br s, 8H, H<sub>Ar</sub>), 4.13-3.78 (m, 24H, O-CH<sub>2</sub>), 3.41-3.24 (m, 24H, -CH<sub>2</sub>-) 2.86-2.70 (br s, 36H, N-CH<sub>3</sub>), 2.04-1.69 (m, 24H, N-CH<sub>2</sub>), 1.46-1.24 (br s, 108H, CH<sub>3</sub>) ppm. **HR-MS**: MALDI (ULTRAFLEX III); DCTB + PMMANa 4300 + NaI; 3785,7904 (calculated for C<sub>212</sub>H<sub>256</sub>N<sub>20</sub>O<sub>40</sub>Zn), 3.808.7796 (experimental for [M+Na]<sup>+</sup>). **UV-vis** (THF) log( $\epsilon$  /M<sup>-1</sup>cm<sup>-1</sup>) ( $\lambda$ ): 4.6 (350 nm); 4.2 (616 nm); 4.9 (685 nm). **Fluorescence** (THF):  $\lambda_{\text{maximum}}$  = 691 nm;  $\lambda_{\text{excitation}}$  = 650 nm.

**3.5 Synthesis of 5: 4** (10.5 mg, 0.003 mmol) was dissolved in dry CH<sub>2</sub>Cl<sub>2</sub> (3.5 mL). TFA (79  $\mu$ L, 1.032 mmol) was added dropwise at 0°C, and the reaction was stirred for 5h at rt. After that time a green oily phase appears. The solvent is removed under reduced pressure. The remaining solid is dissolved in water (0.3 mL), turning the product from green to blue, and precipitated by adding acetone (5 mL). After filtration, the product is obtained as a blue solid in a 55 % yield (6 mg). **<sup>1</sup>H-NMR** (300 MHz, DMSO-d<sub>6</sub>):  $\delta$  9.53-9.34 (m, 4H, H<sub>Ar</sub>), 8.93-8.48 (br s, 24H, NH<sub>2</sub>); 8.44-8.32 (m, 4H, H<sub>Ar</sub>); 8.23 (s, 4H, H<sub>Ar</sub>); 8.14-7.98 (m, 8H, H<sub>Ar</sub>); 7.86-7.76 (m, 4H, H<sub>Ar</sub>), 7.72-7.50 (m, 8H, H<sub>Ar</sub>), 6.92 (s, 8H, H<sub>Ar</sub>), 4.19-4.04 (m, 16H, O-CH<sub>2</sub>), 4.02-3.94 (m, 8H, O-CH<sub>2</sub>), 3.15-2.99 (m, 24H, N-CH<sub>2</sub>), 2.61 (s, 36H, CH<sub>3</sub>), 2.15-1.90 (m, 24H, -CH<sub>2</sub>-) ppm. **HR-MS**: MALDI (ULTRAFLEX III); ACC + PPGNa 2000 + PPGNa 2700; 2584,1660 (calculated for C<sub>153</sub>H<sub>161</sub>N<sub>19</sub>O<sub>16</sub>Zn), 2586.1685 (experimental for [M+H]<sup>+</sup>).

**3.6 Synthesis of 1: 5** (as the trifluoroacetate salt) (6 mg, 0.002 mmol) was dissolved in 0.84 mL of dry DMF (dried over 4Å molecular sieves). Then, an excess of IMe (10.8  $\mu$ L, 0.174mmol) and PMP (10.1  $\mu$ L, 0.056mmol) were added and left reacting overnight at rt. Then acetone (5 mL) was added, and the blue solid is separated from the supernatant through centrifugation. The solid is further washed with acetone three more times until the supernatant was colourless. The blue solid was dissolved in 5 mL of MilliQ water and 250mg of Dowex® (1x8 200-400) were added. After stirring for 2h the resin was filtered, and the solvent evaporated under reduced pressure. Yield: 98% (5 mg). **<sup>1</sup>H-NMR** (300 MHz, DMSO-d<sub>6</sub>):  $\delta$  9.49-9.31 (m, 4H, H<sub>Ar</sub>), 8.38-8.29 (m, 4H, H<sub>Ar</sub>), 8.25-8.17 (m, 4H, H<sub>Ar</sub>), 8.13-7.95 (m, 8H, H<sub>Ar</sub>), 7.86-7.75 (m, 4H, H<sub>Ar</sub>), 7.73-7.62 (m, 4H, H<sub>Ar</sub>), 7.61-7.50 (m, 4H, H<sub>Ar</sub>), 6.97 (s, 8H, H<sub>Ar</sub>), 4.17-4.07 (m, 16H, O-CH<sub>2</sub>), 4.02-3.92 (m, 8H, O-CH<sub>2</sub>), 3.72-3.43 (m, 24H, N-CH<sub>2</sub>), 3.15 (s, 108H, CH<sub>3</sub>), 2.26-2.06 (m, 24H, -CH<sub>2</sub>-) ppm. **HR-MS**: (ESI Positive ESI+50-3000.m/ Dilution 0.5:0.5:5 H<sub>2</sub>O:DMSO: MeOH+0.1% TFA) for C<sub>177</sub>H<sub>221</sub>N<sub>19</sub>O<sub>16</sub>Zn: m/z 1291.8271 [MTFA<sub>8</sub>Cl]<sup>3+</sup> (calculated: 1291.8292); m/z 959.8782 [MTFA<sub>8</sub>]<sup>4+</sup> (calculated: 959.8798); m/z 940.6239 [MTFA<sub>7</sub>Cl]<sup>4+</sup> (calculated: 940.6255); m/z 745.5053 [MTFA<sub>7</sub>]<sup>5+</sup> (calculated: 745.5067); m/z 602.4234 [MTFA<sub>6</sub>]<sup>6+</sup> (calculated: 602.4246); m/z 500.0789 [MTFA<sub>5</sub>]<sup>7+</sup> (calculated: 500.0803); m/z 423.5709 [MTFA<sub>4</sub>]<sup>8+</sup> (calculated: 423.5720). **UV-vis** (DMSO) log( $\epsilon$  /M<sup>-1</sup>cm<sup>-1</sup>) ( $\lambda$ ): 4.0 (323 nm); 4.0 (618 nm); 4.7 (691 nm). **Fluorescence** (THF):  $\lambda_{\text{maximum}}$  = 697 nm;  $\lambda_{\text{excitation}}$  = 650 nm.

#### 4. NMR spectra

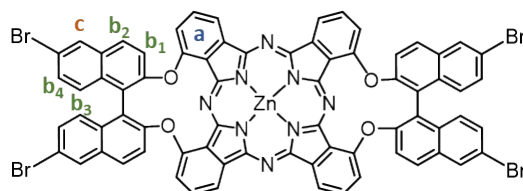

Figure 1 Structure of  $(AA)_2-1$  and H assignment for  $^1H$  NMR

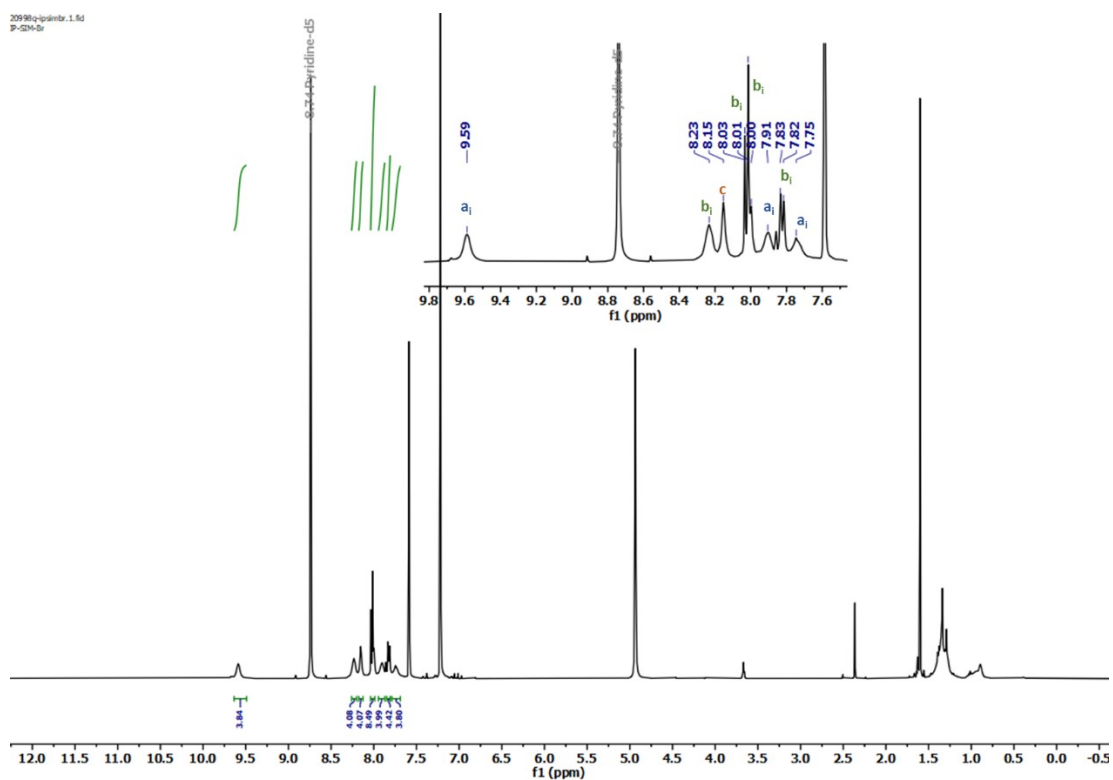

Figure 2  $^1H$  NMR (Pyridine- $d_5$ , 500 MHz) of  $(AA)_2-1$

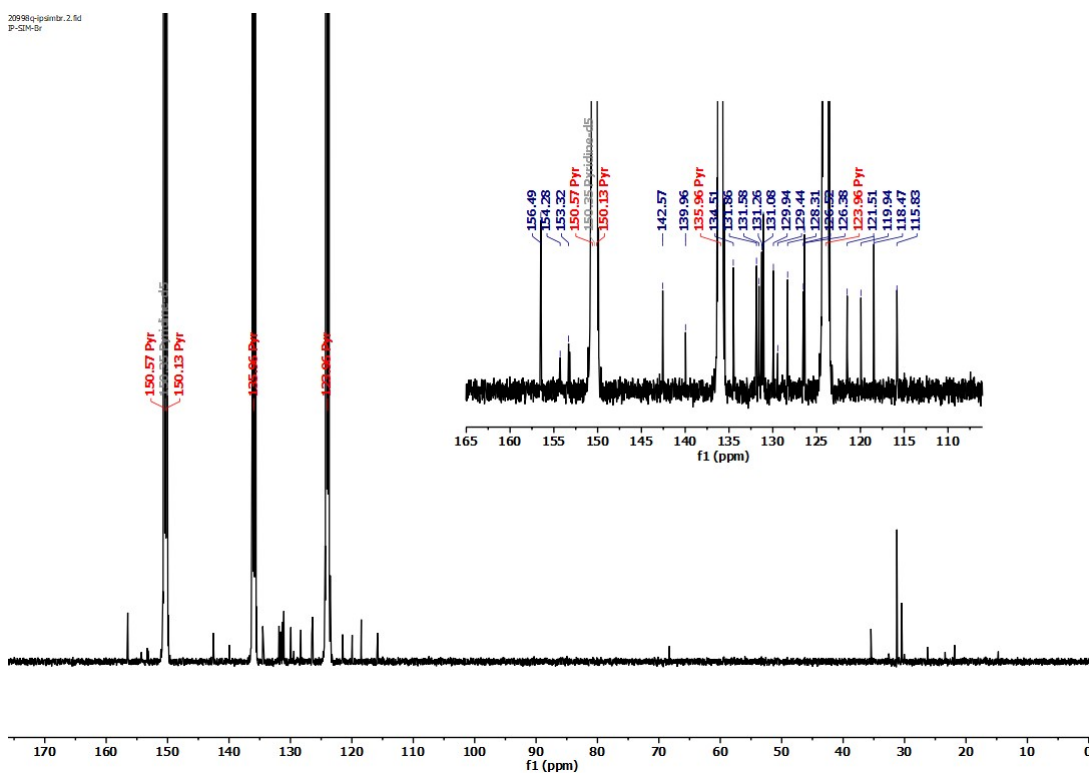

Figure 3  $^{13}\text{C}$  NMR (Pyridine- $\text{d}_5$ , 126 MHz) of  $(\text{AA})_2\text{-1}$

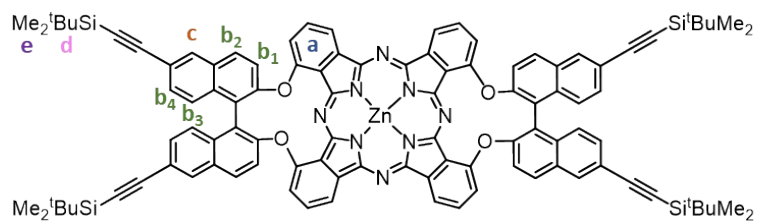

**Figure 4** Structure of **(AA)<sub>2</sub>-2** and H assignation for <sup>1</sup>H NMR

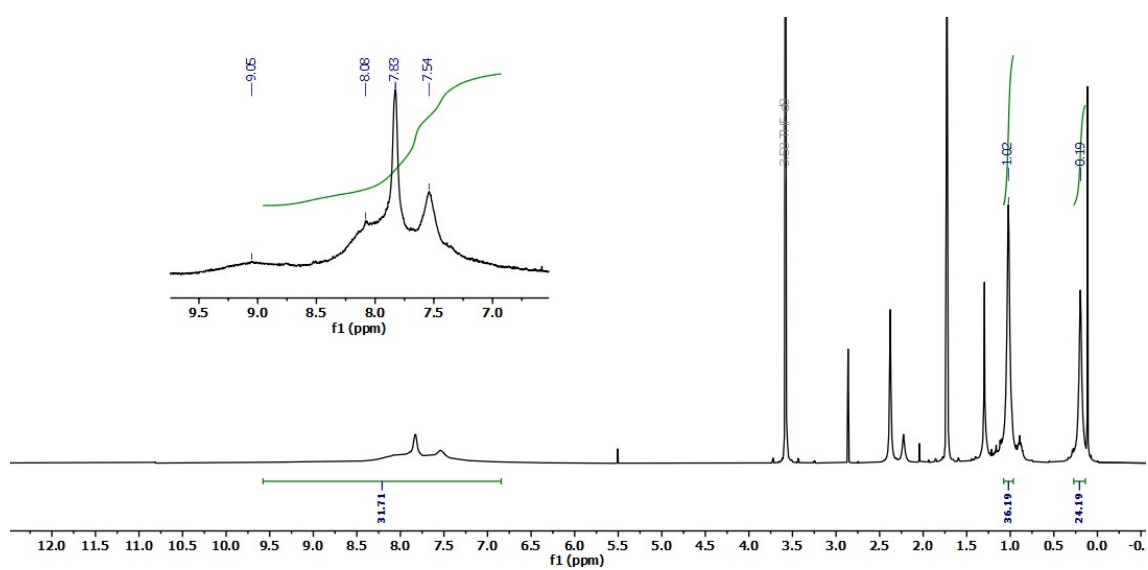

**Figure 5** <sup>1</sup>H NMR (THF-d<sub>8</sub>, 300 MHz) of **(AA)<sub>2</sub>-2**

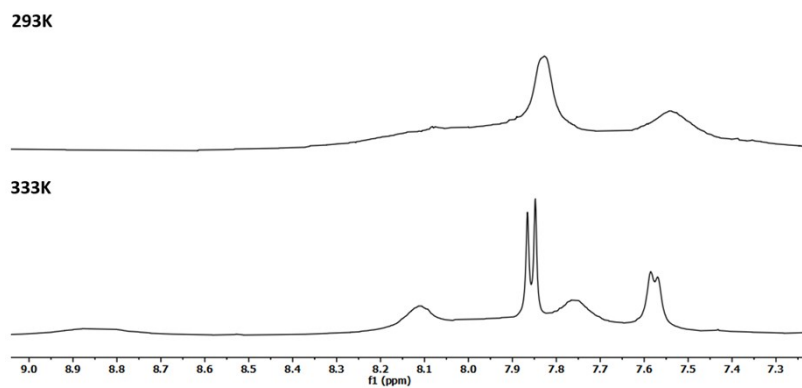

**Figure 6** <sup>1</sup>H NMR (THF-d<sub>8</sub>, 300 MHz) of **(AA)<sub>2</sub>-2** (disaggregation induced by temperature)



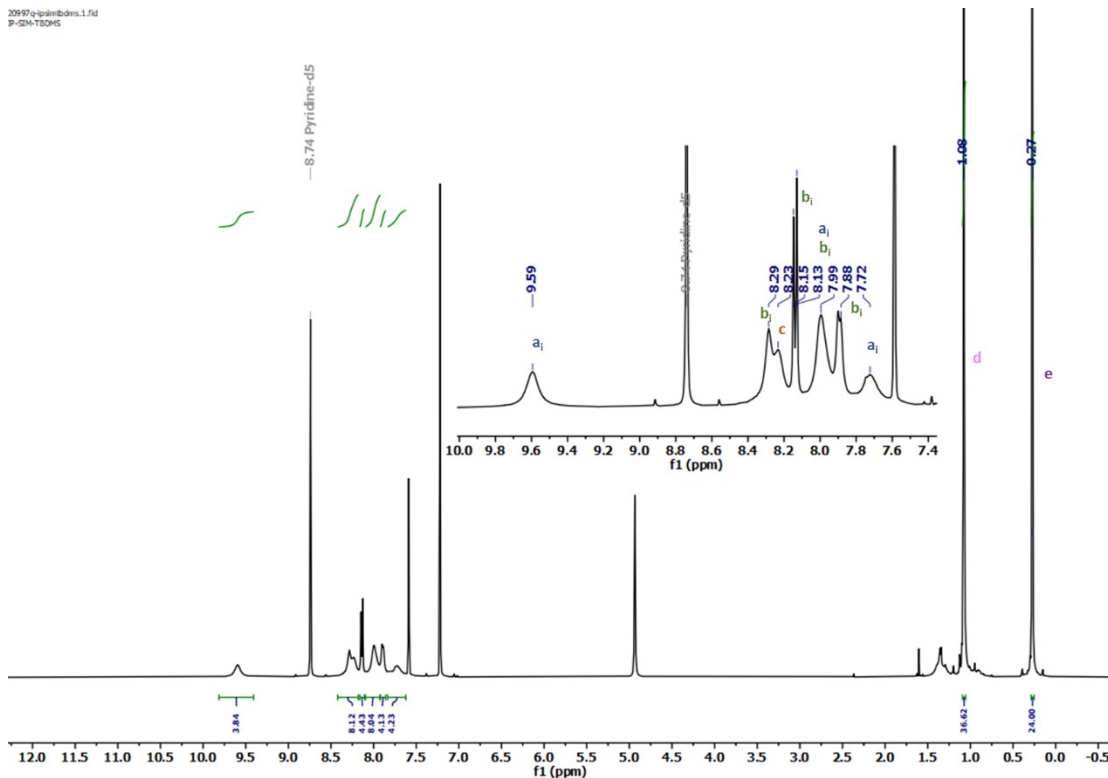

Figure 7  $^1\text{H}$  NMR ( $\text{Pyridine-d}_5$ , 500 MHz) of  $(\text{AA})_2\text{-2}$

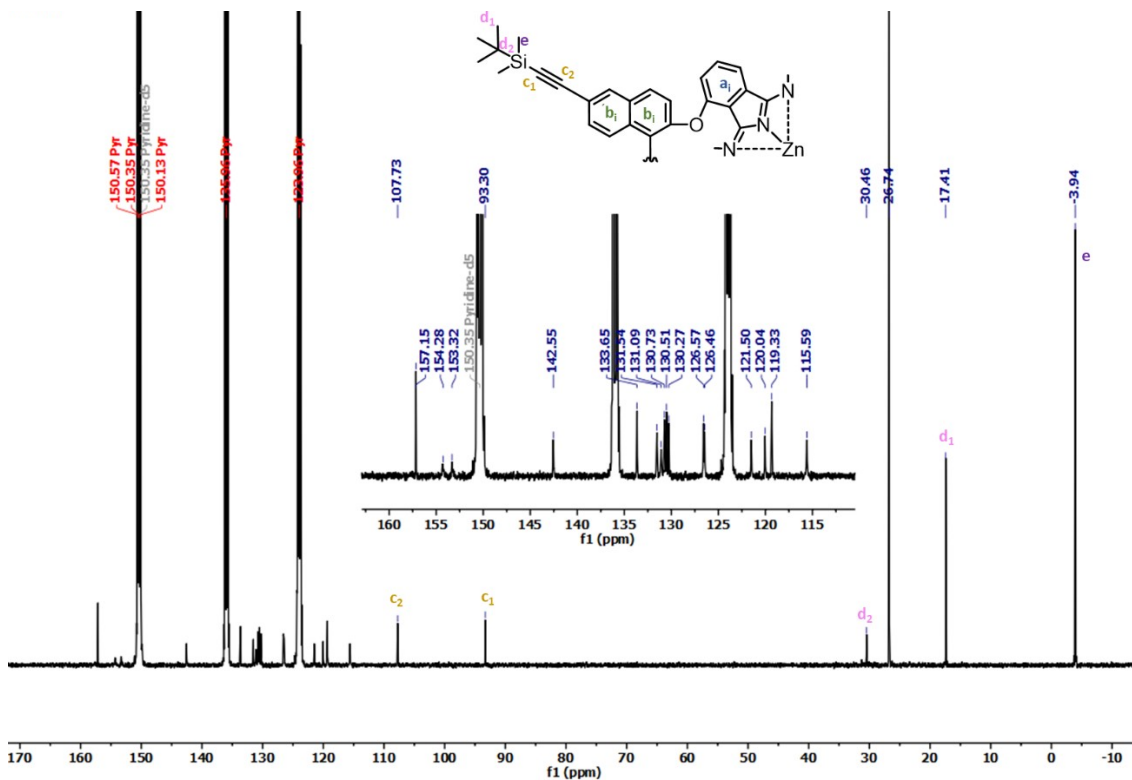

Figure 8  $^{13}\text{C}$  NMR ( $\text{Pyridine-d}_5$ , 126 MHz) of  $(\text{AA})_2\text{-2}$

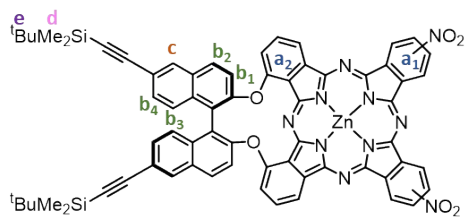

**Figure 9** Structure of **AABB-3** and H assignation for  $^1\text{H}$  NMR.

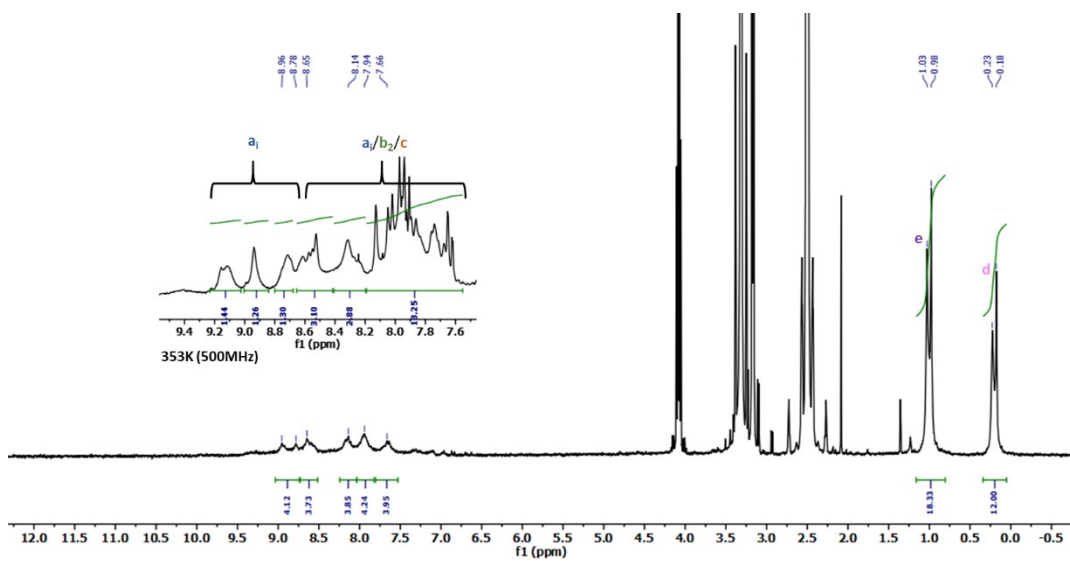

**Figure 10**  $^1\text{H}$  NMR ( $\text{DMSO-d}_6$ , 300 MHz) of **AABB-3**

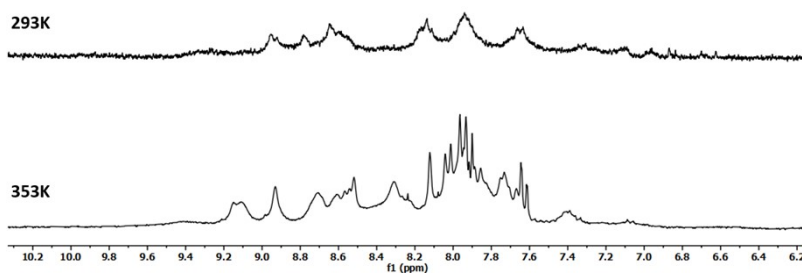

**Figure 11**  $^1\text{H}$  NMR ( $\text{DMSO-d}_6$ , 500 MHz) of **AABB-3** (disaggregation induced by temperature).

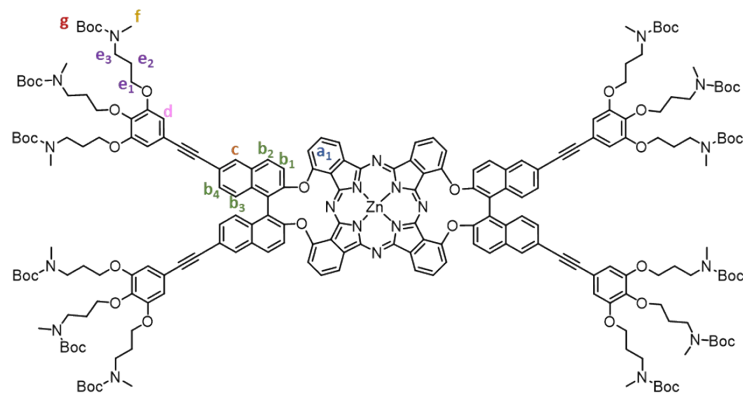

**Figure 12** Structure of **4** and H assignation for  $^1\text{H}$  NMR.

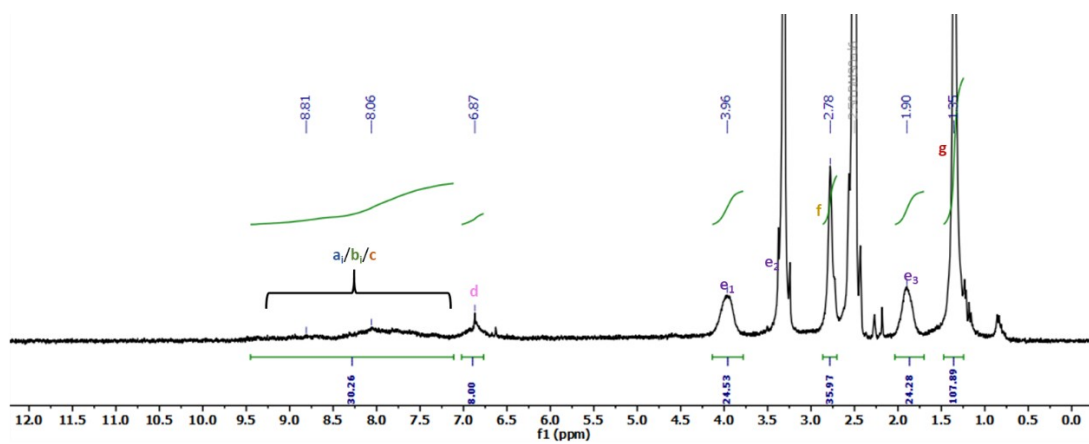

**Figure 13**  $^1\text{H}$  NMR ( $\text{DMSO-d}_6$ , 300 MHz) of **4**

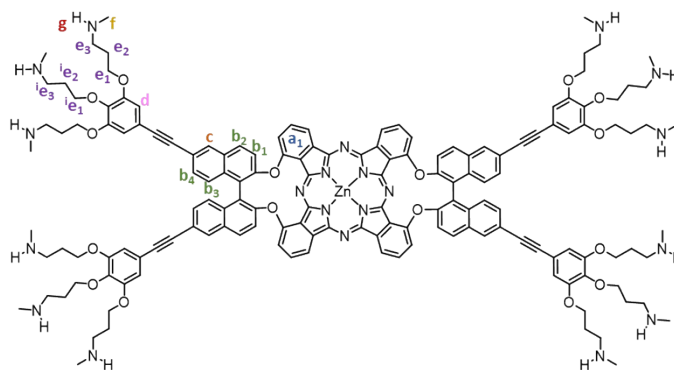

Figure 14 Structure of **5** and H assignment for  $^1\text{H}$  NMR

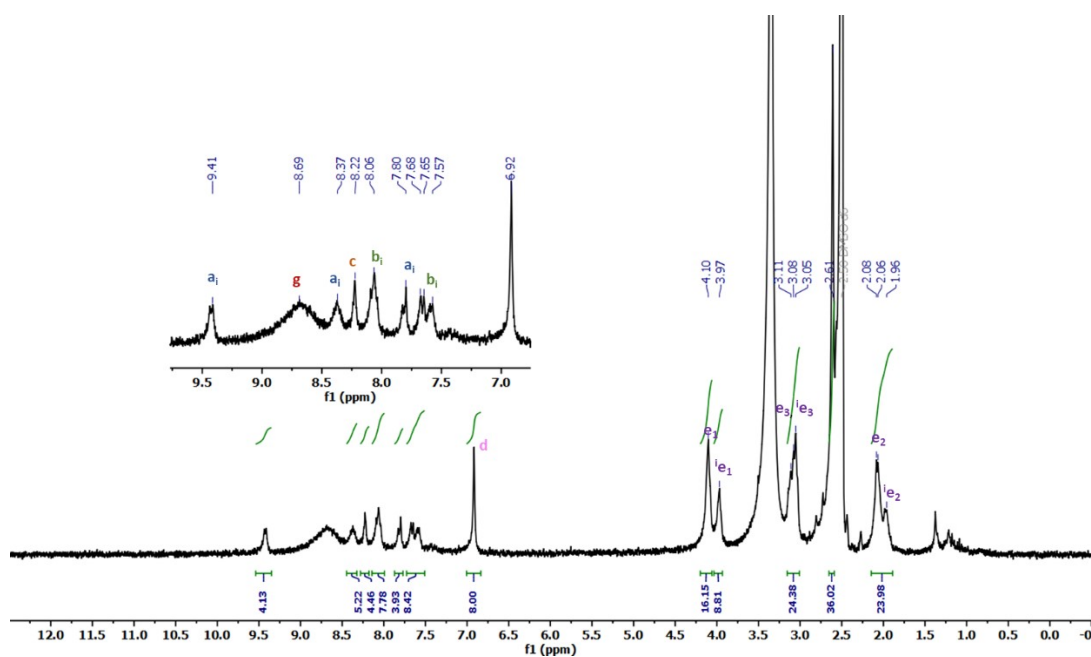

Figure 15  $^1\text{H}$  NMR (DMSO- $d_6$ , 300 MHz) of **5**

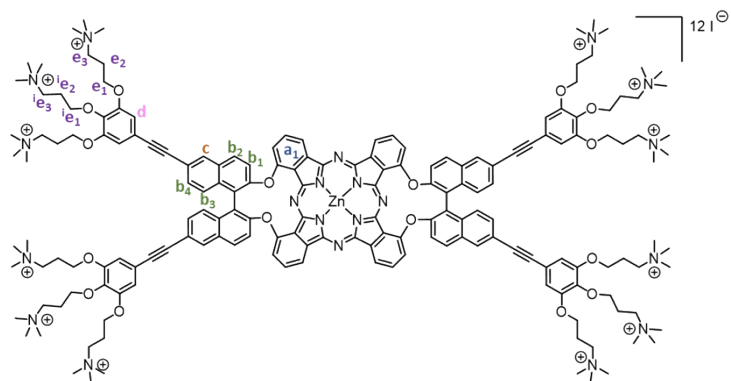

**Figure 16** Structure of **1** with I<sup>-</sup> as counterion and H assignation for <sup>1</sup>H NMR

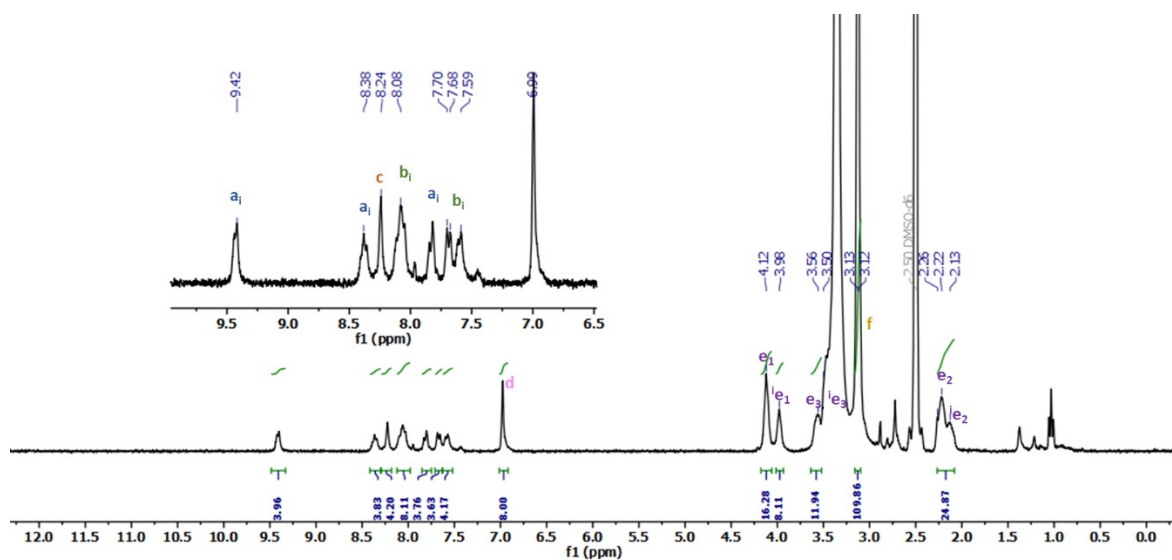

**Figure 17** <sup>1</sup>H NMR (DMSO-d<sub>6</sub>, 300 MHz) of **1**

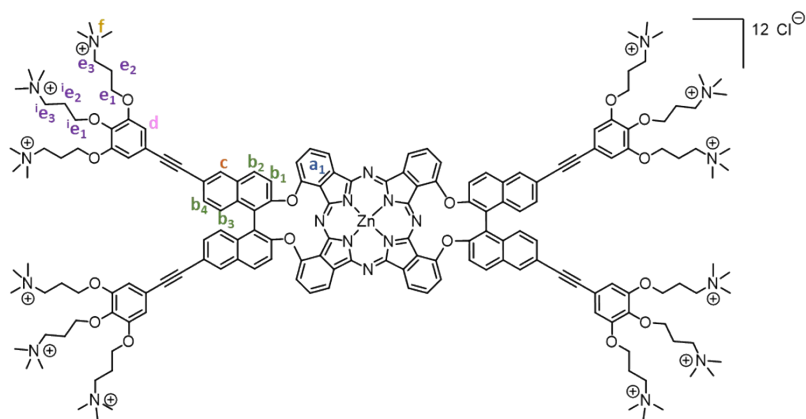

**Figure 18** Structure of **1** with Cl<sup>-</sup> as counterion and H assignment for <sup>1</sup>H NMR

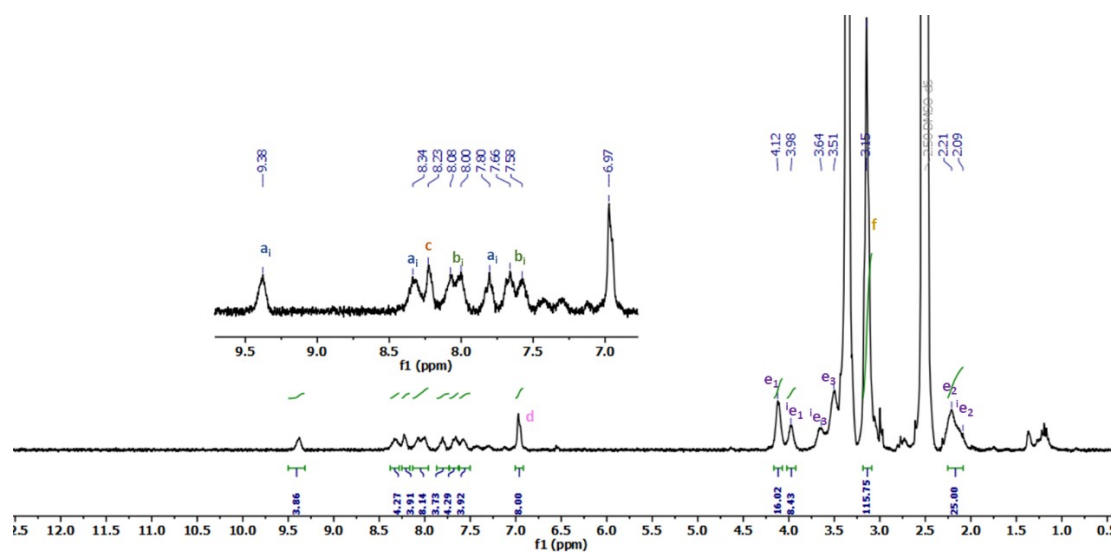

**Figure 19** <sup>1</sup>H NMR (DMSO-d<sub>6</sub>, 300 MHz) of **1**

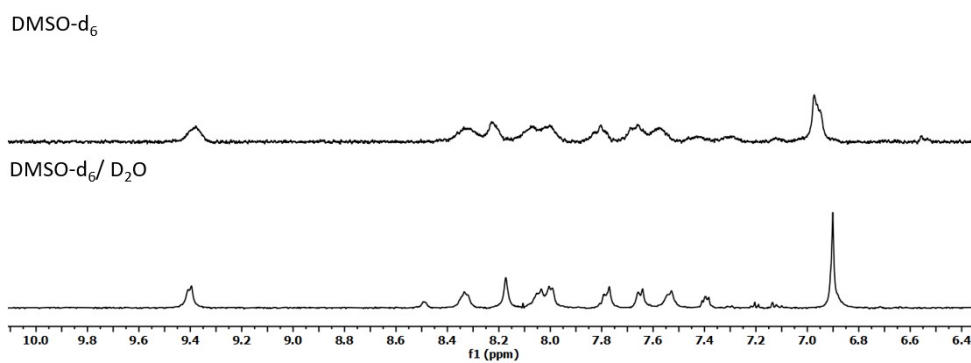

**Figure 20** <sup>1</sup>H NMR (DMSO-d<sub>6</sub>) of **1** (disaggregation induced by D<sub>2</sub>O)

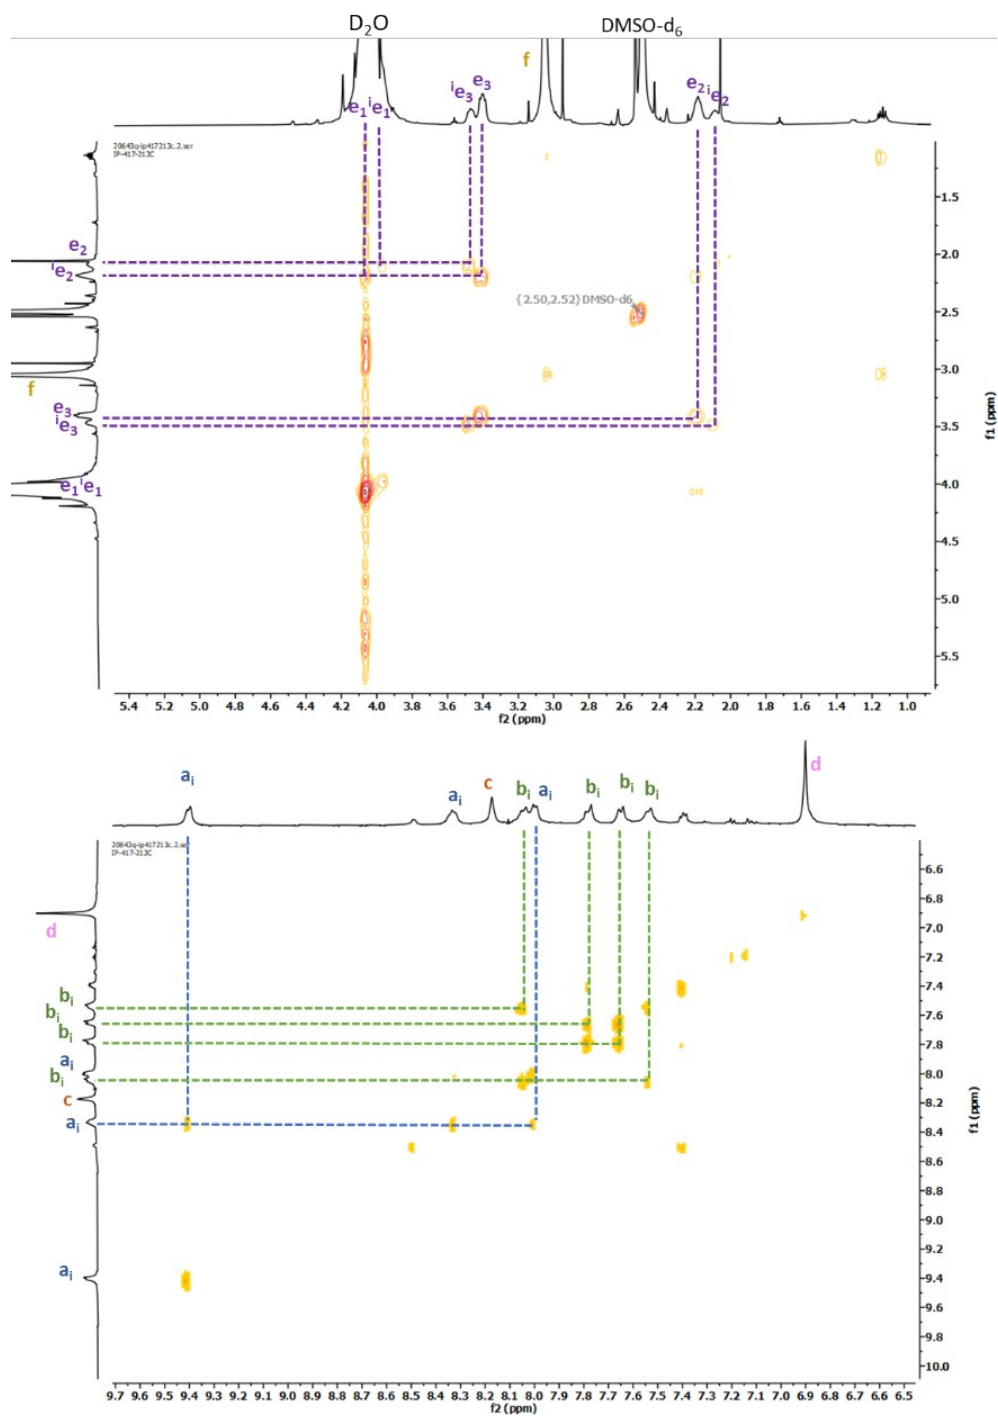

**Figure 21** COSY (DMSO-d<sub>6</sub>/D<sub>2</sub>O, 500 MHz) of **1**

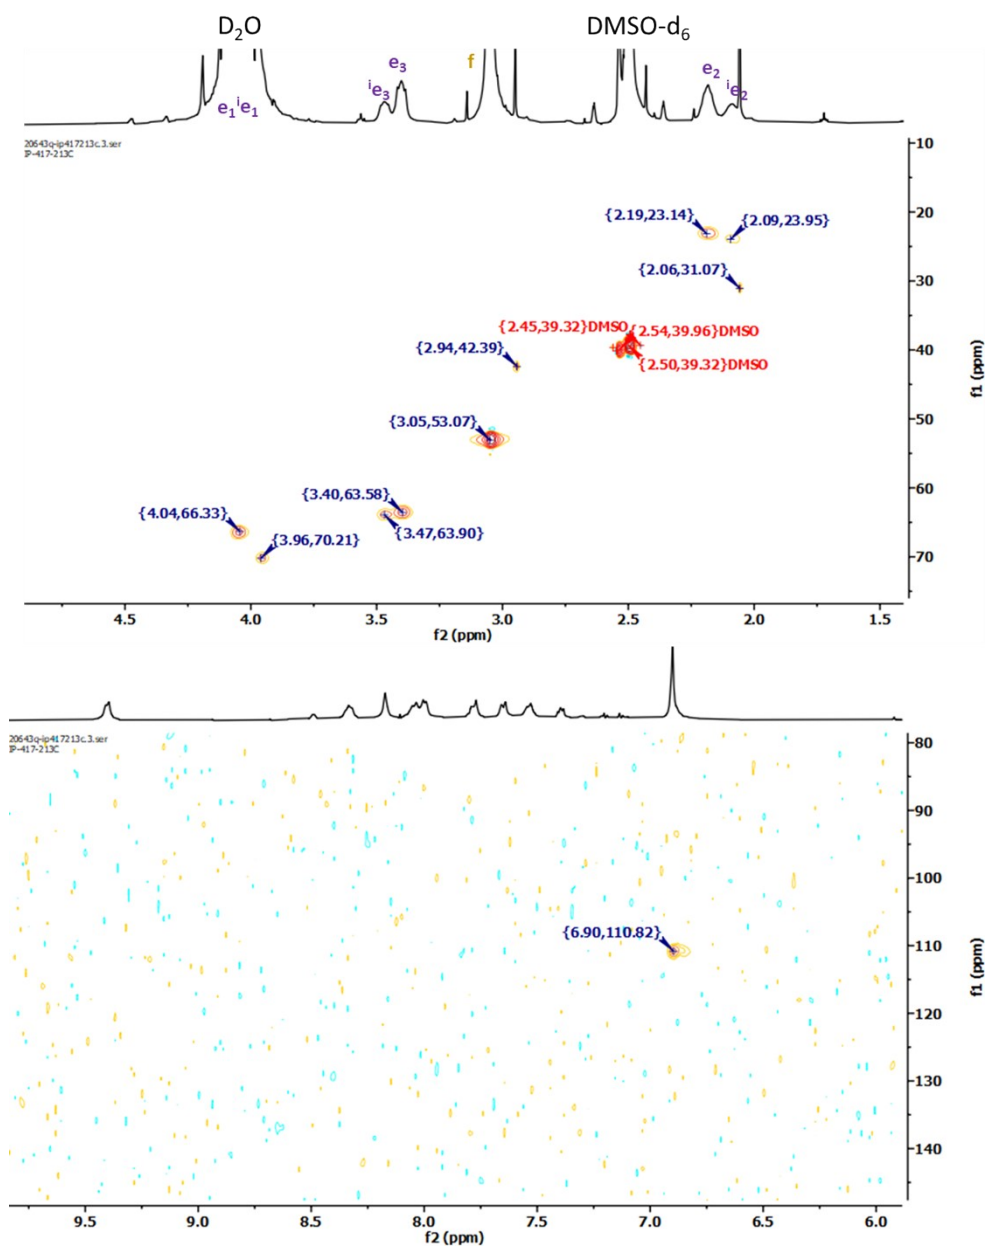

Figure 22 HSQC (DMSO-d<sub>6</sub>/D<sub>2</sub>O, 126 MHz) of 1



## 5. MS and HRMS analysis

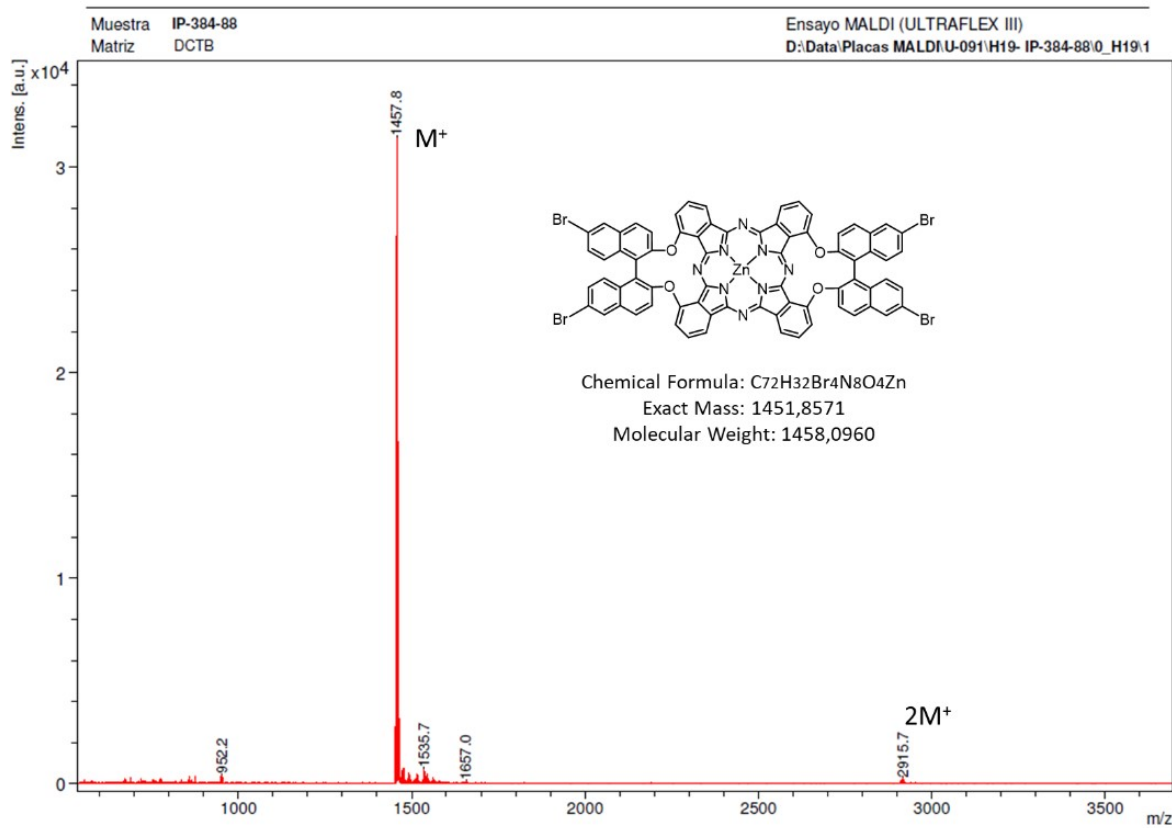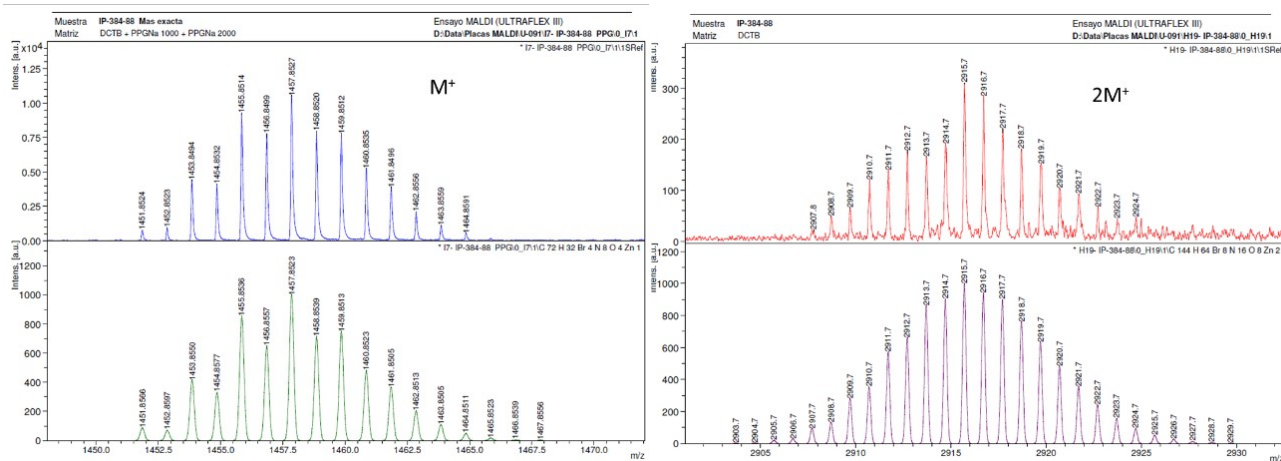

Figure 23 MS and HR-MS spectra of **(AA)<sub>2</sub>-1**

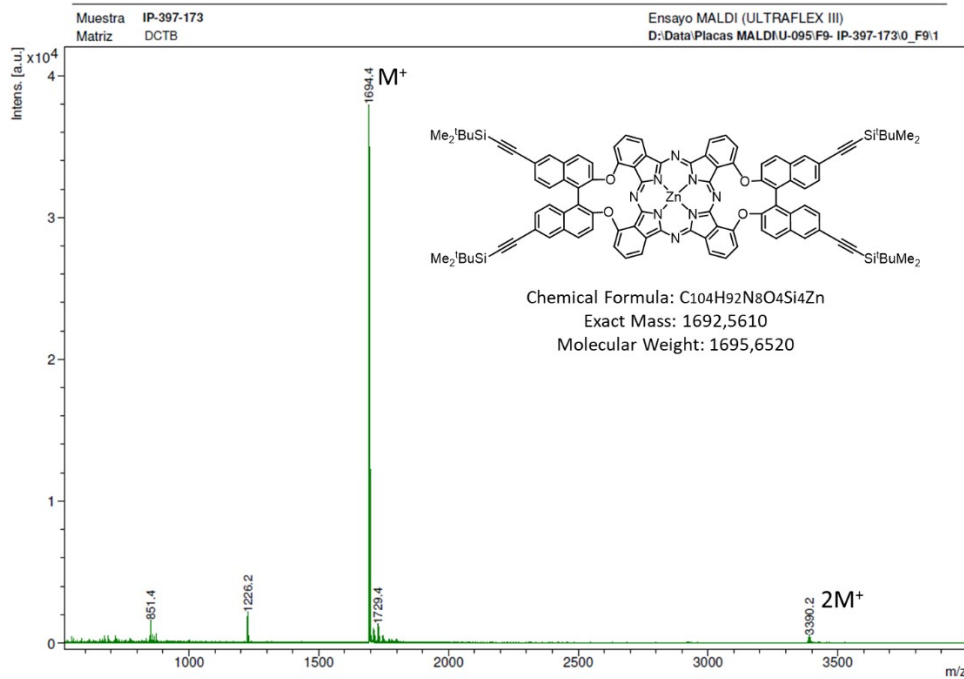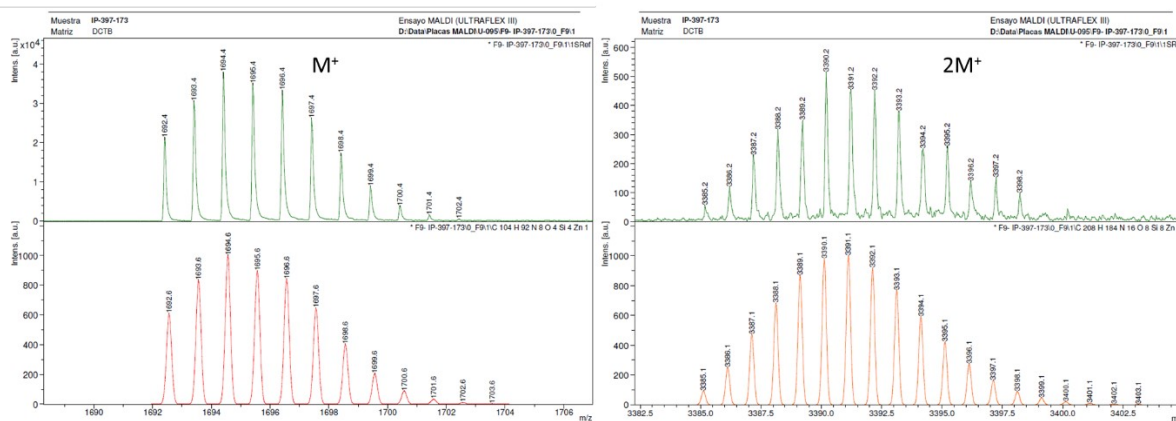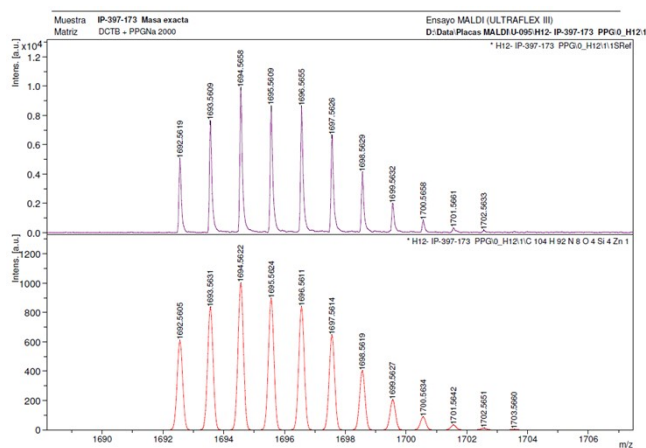

Figure 24 MS and HR-MS spectra of (AA)<sub>2</sub>-2

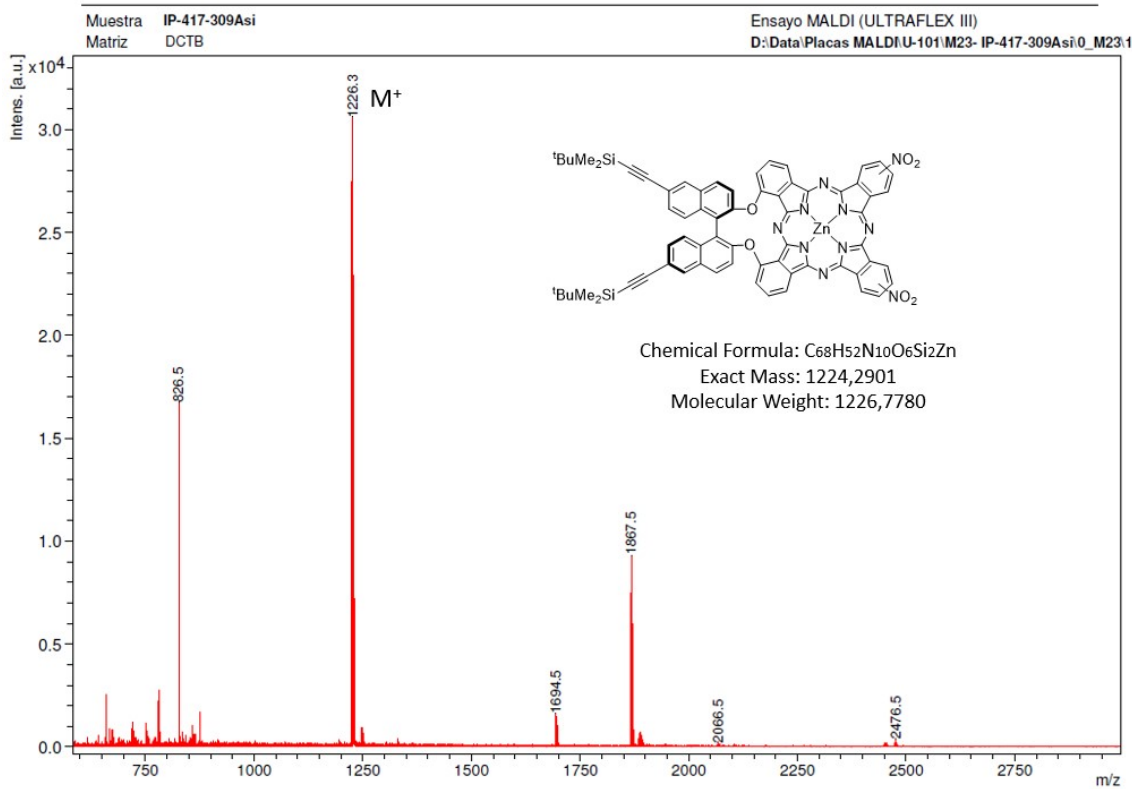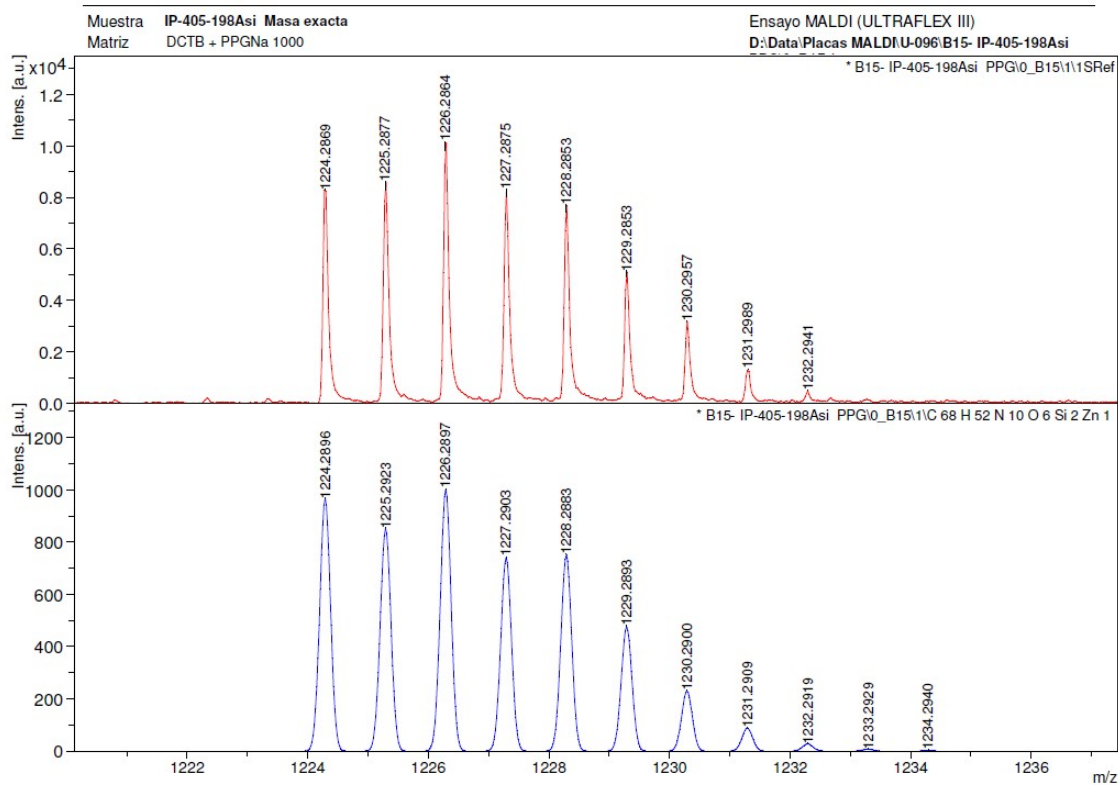

Figure 25 MS and HR-MS spectra of ABB-3.

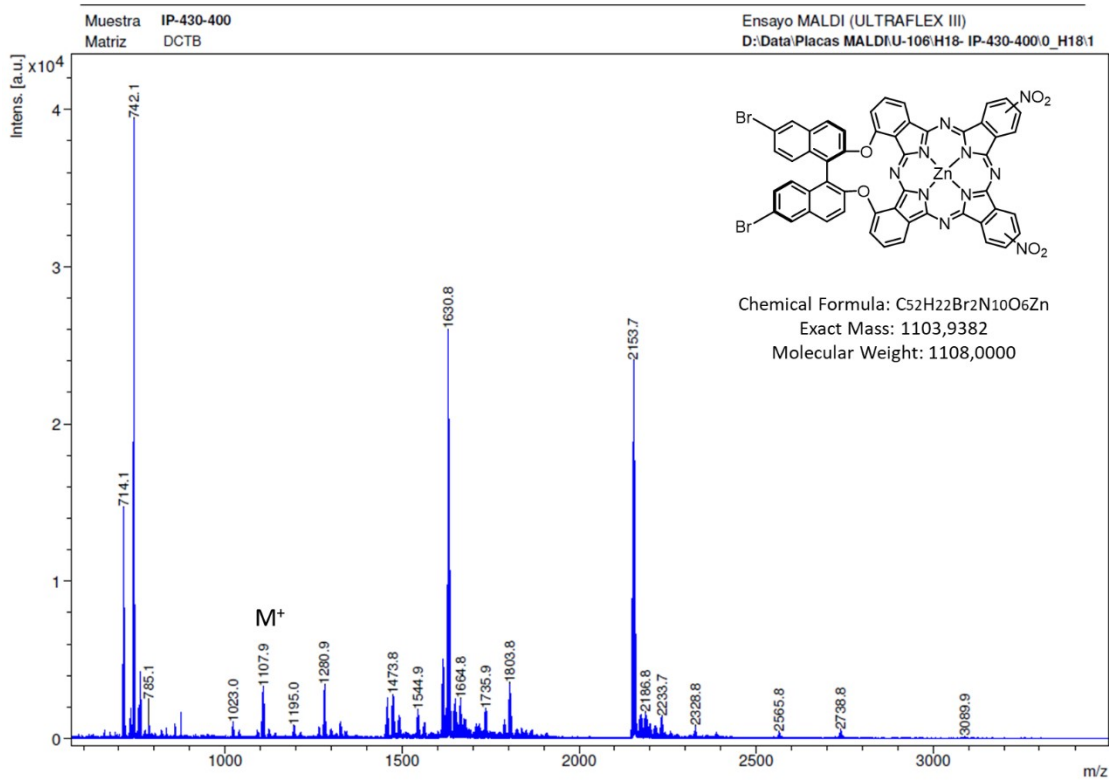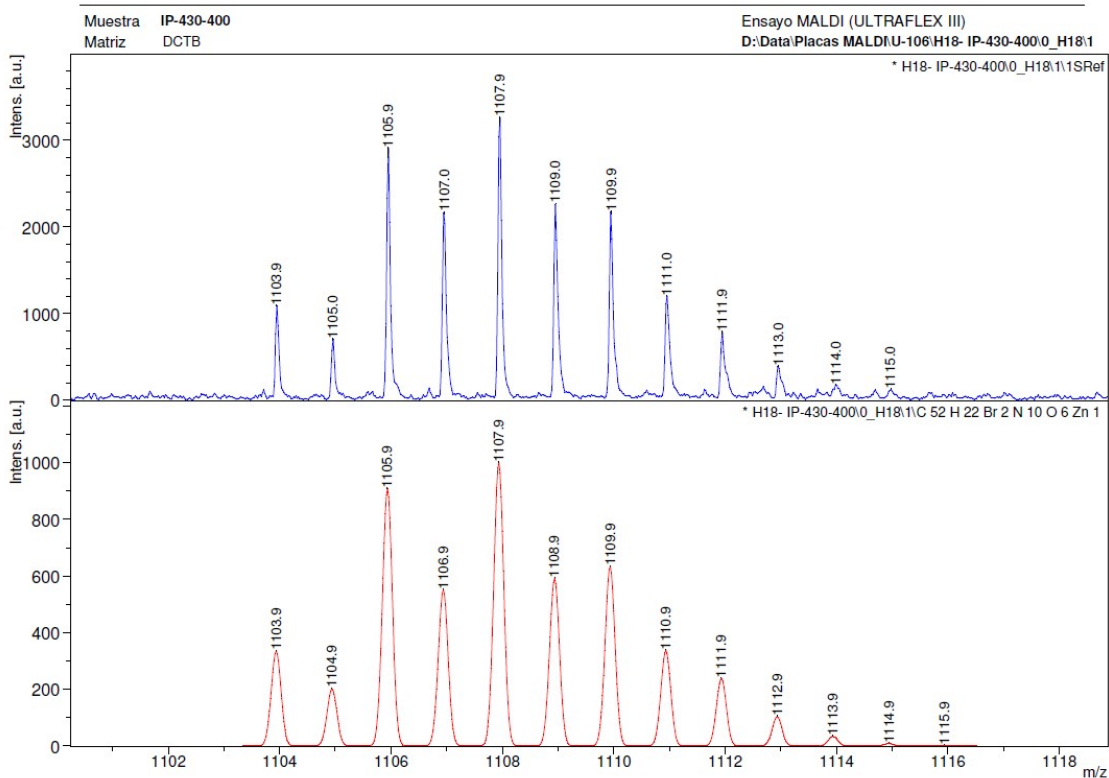

Figure 26 MS spectrum of mixture containing ABB-4.

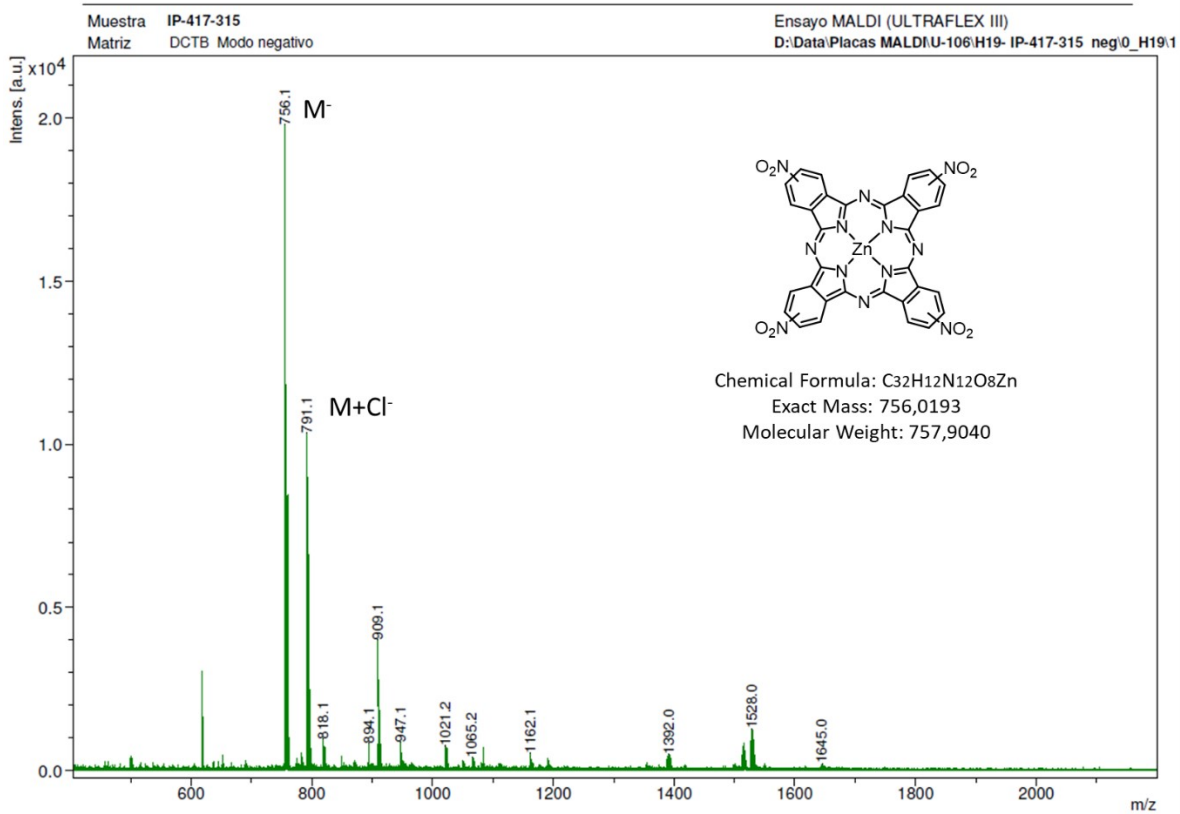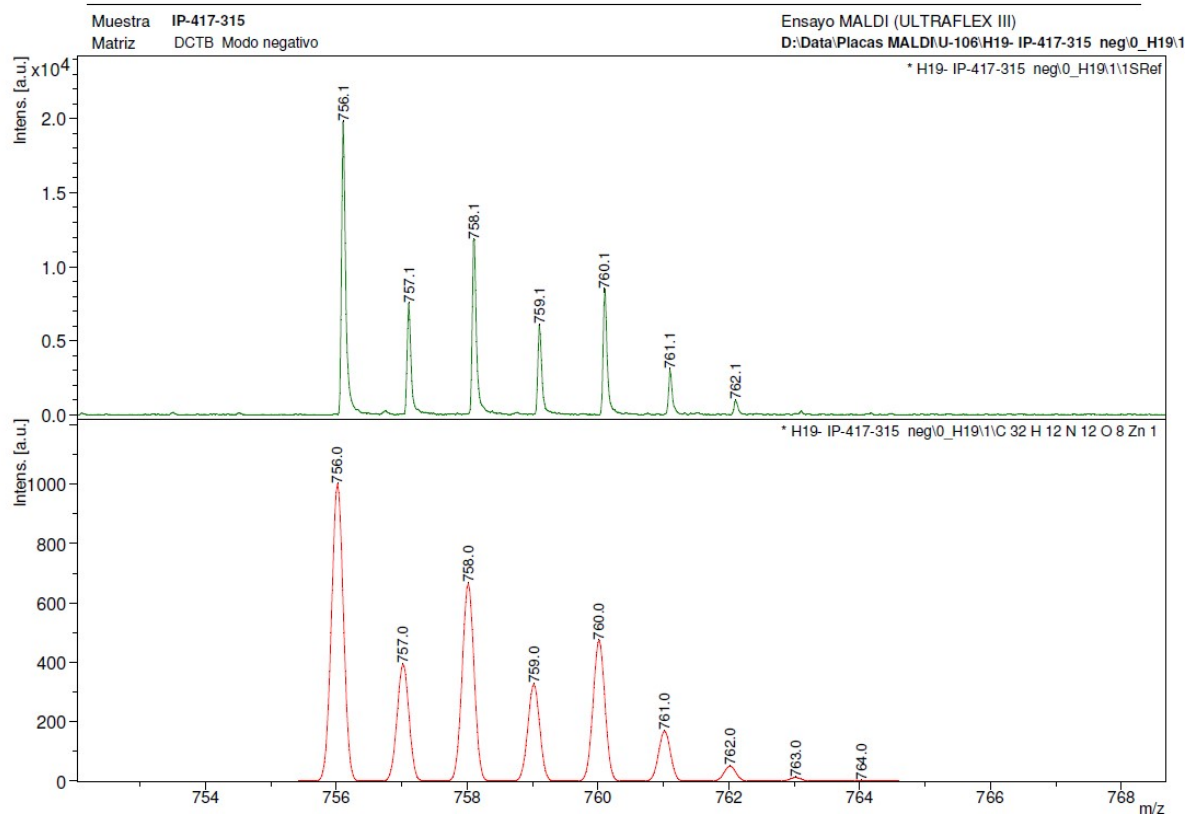

Figure 27 MS spectrum of **B<sub>4</sub>**.

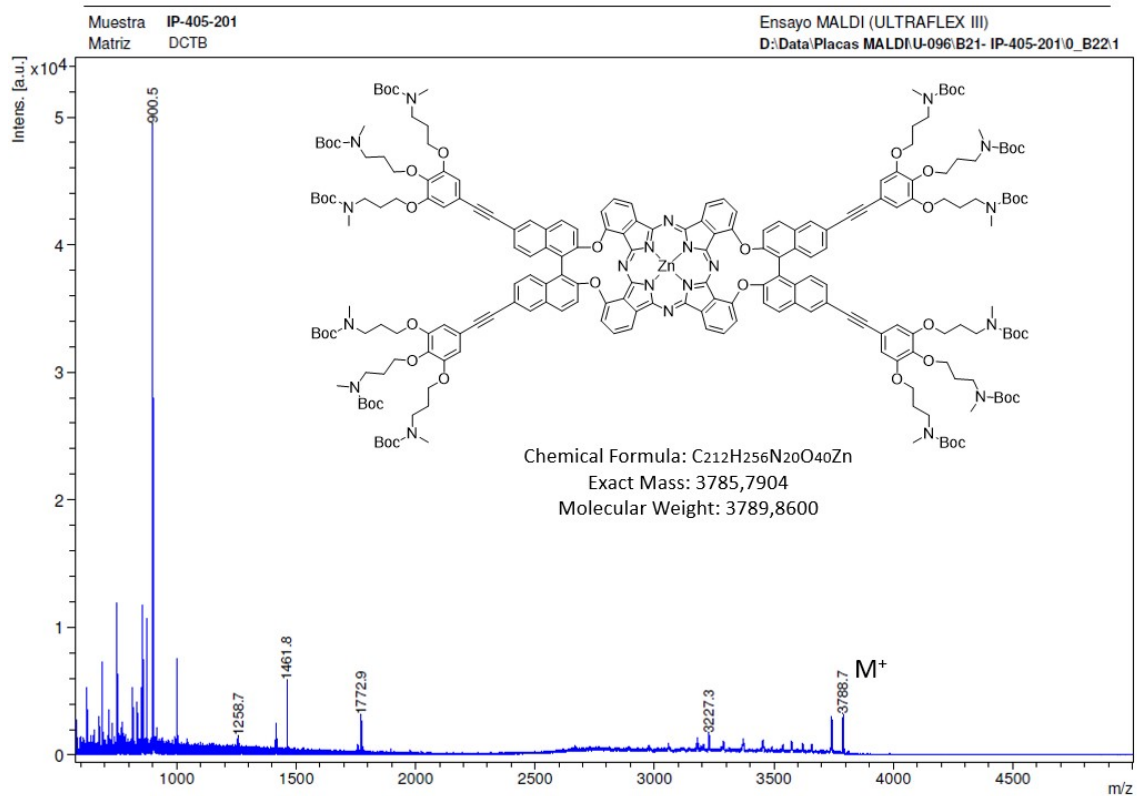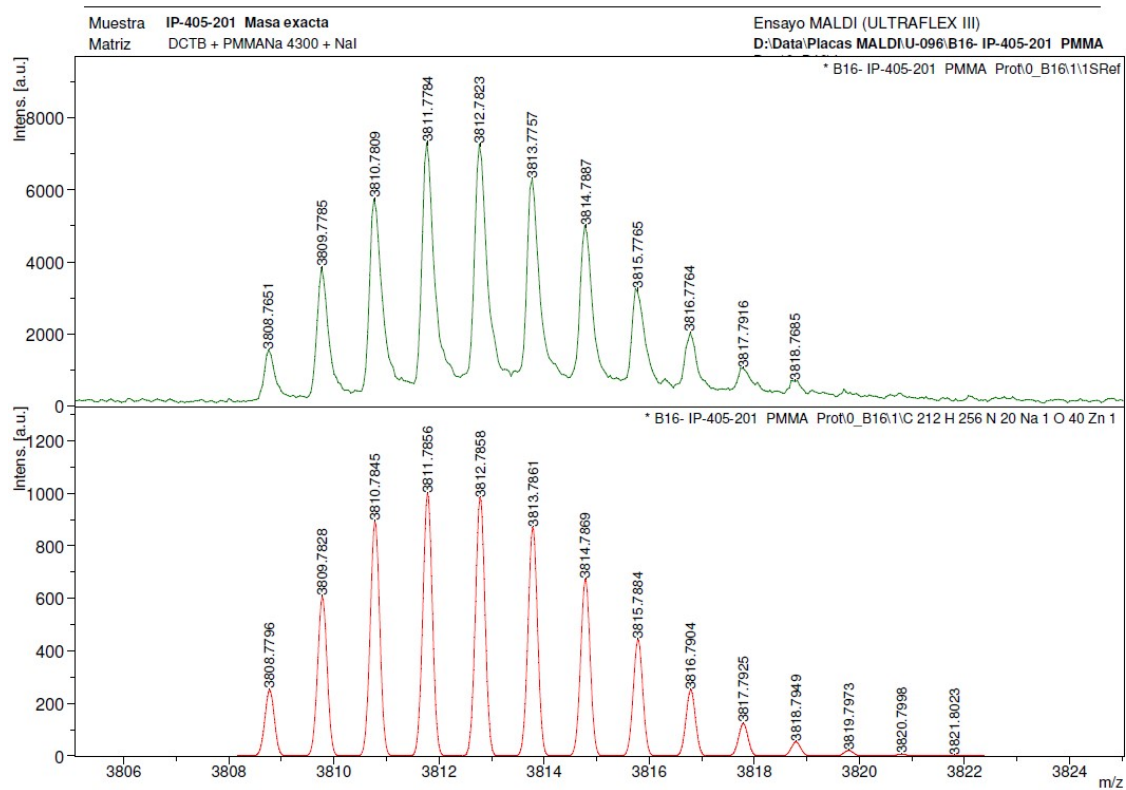

Figure 28 MS and HR-MS spectra of 4.

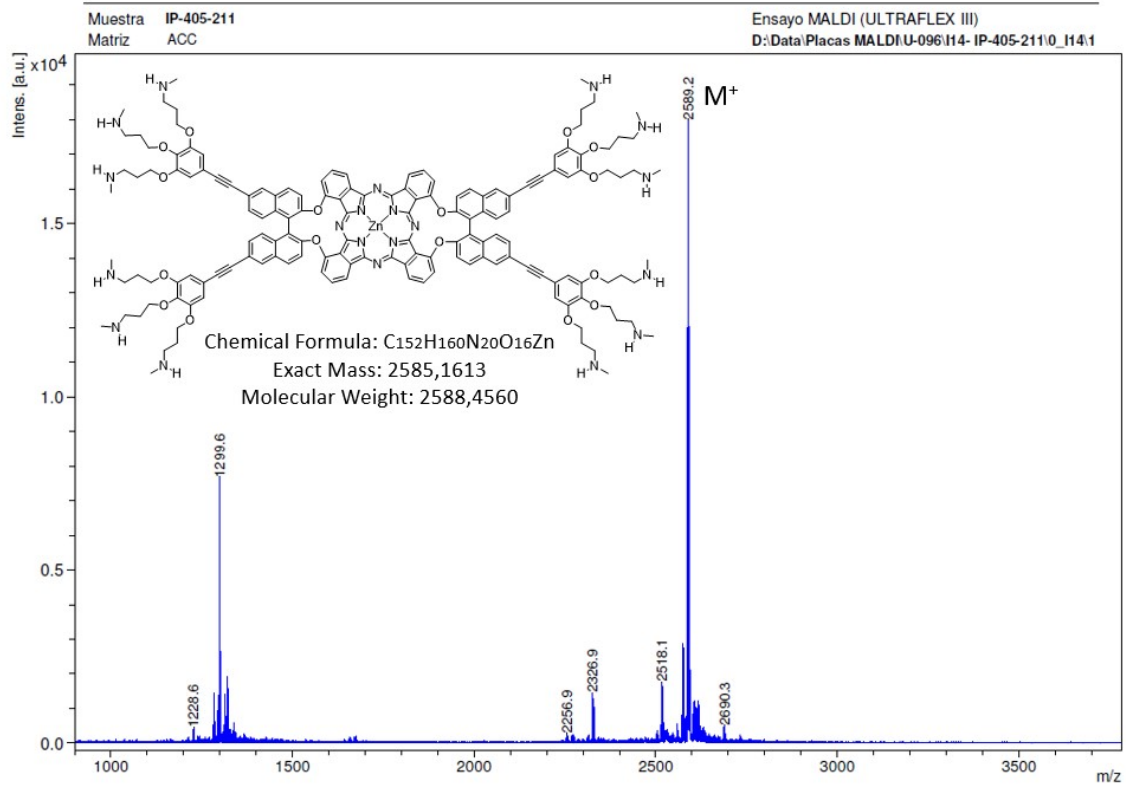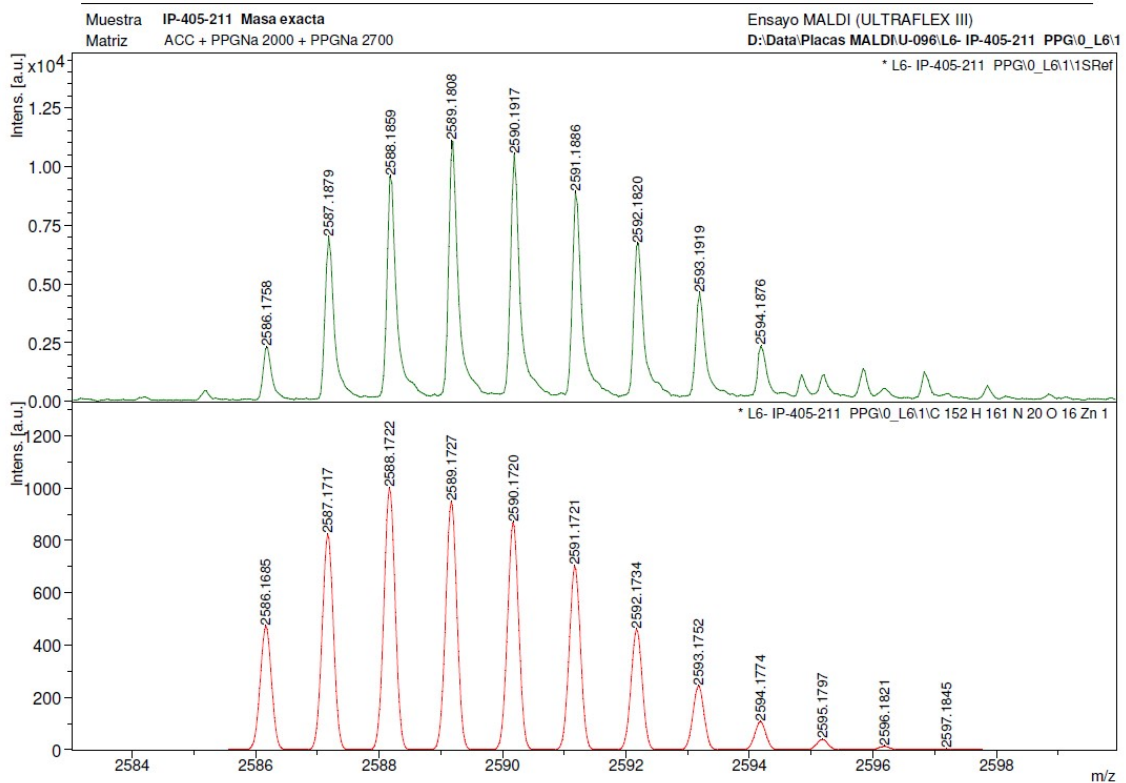

Figure 29 MS and HR-MS spectra of 5.

Nombre muestra IP-405-213CI  
 Nombre registro D:\Data\2022\2022\_03 MARZO\IMAX4797.d  
 Metodo ESI Positive ESI+ 50-3000.m  
 Comentarios Muestra+250 ul de H2O. Dilucion 1:1 con DMSO. Dilucion 1:5 con MeOH+0.1% TFA

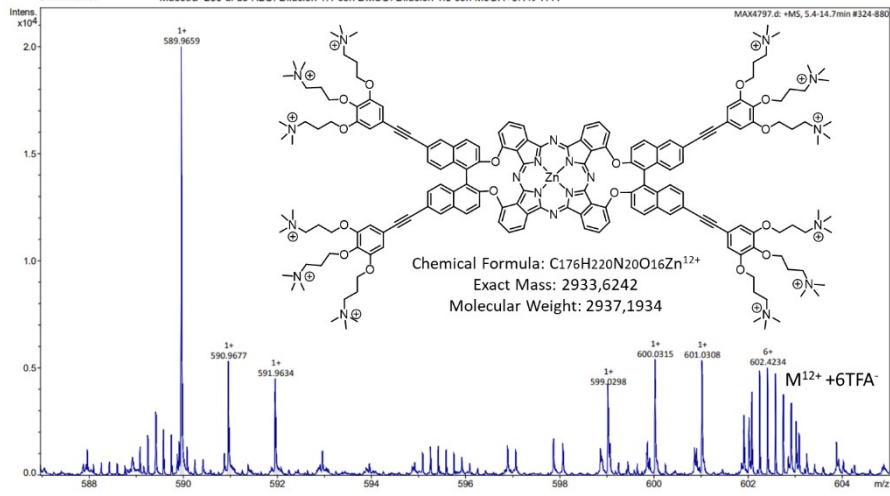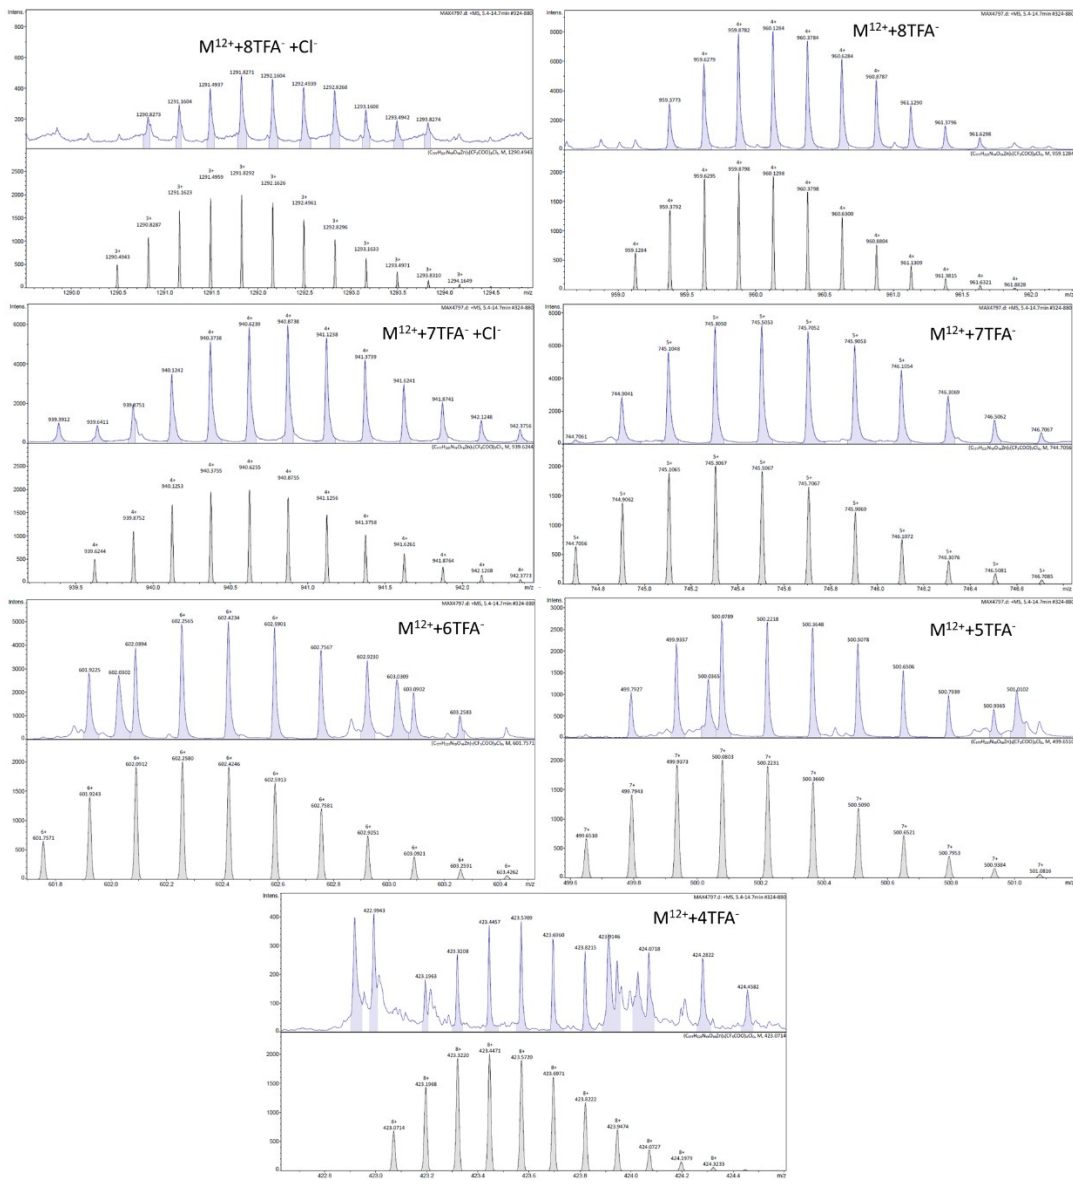

Figure 30 MS and HR-MS spectra of 1.



## 6. UV-Vis and fluorescence spectra

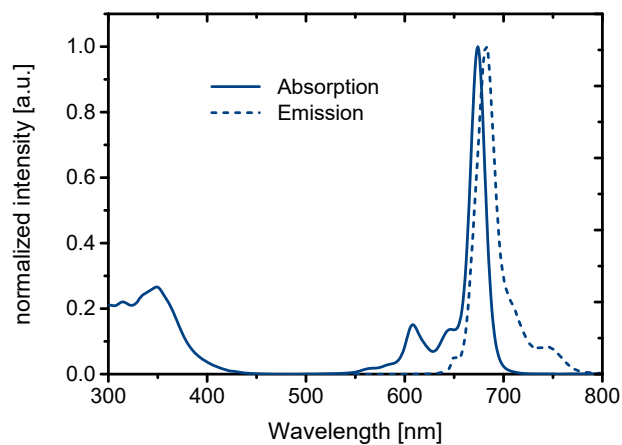

**Figure 31** Normalized absorption and emission spectra of **(AA)<sub>2</sub>-2** from a  $5 \times 10^{-6}$ M solution in THF ( $\lambda_{\text{exc}} = 650$  nm).

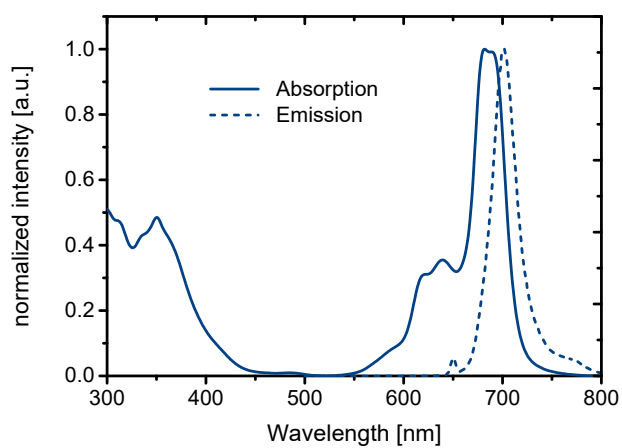

**Figure 32** Normalized absorption and emission spectra of **AAB-3** in THF from a  $5 \times 10^{-6}$ M solution in THF ( $\lambda_{\text{exc}} = 650$  nm).

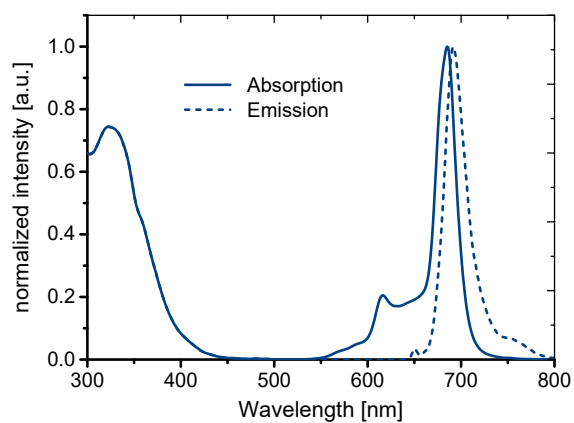

**Figure 33** Normalized absorption and emission spectra of **4** in THF from a  $2 \times 10^{-6}$ M solution in THF ( $\lambda_{\text{exc}} = 650$  nm).

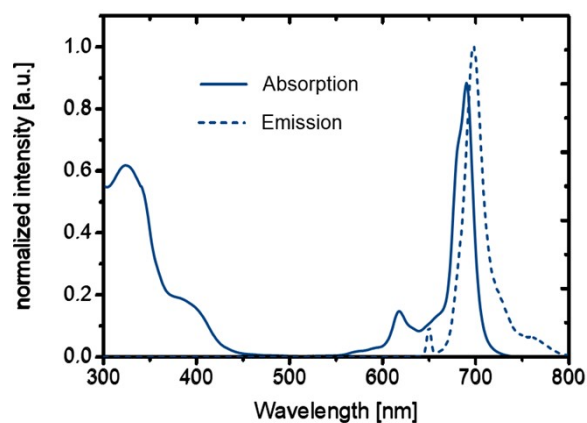

**Figure 34** Normalized absorption and emission spectra of **1** in THF from a  $5 \times 10^{-6}$ M solution in THF ( $\lambda_{\text{exc}} = 650$  nm).

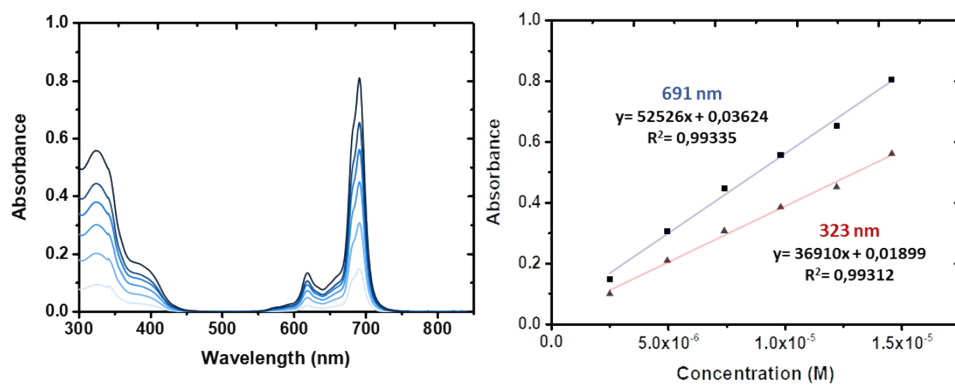

**Figure 35** Ground-state absorption experiments. Plotting of absorbance vs concentration and linear regression for **1** in DMSO.

## 7. DLS analysis of nanoparticles

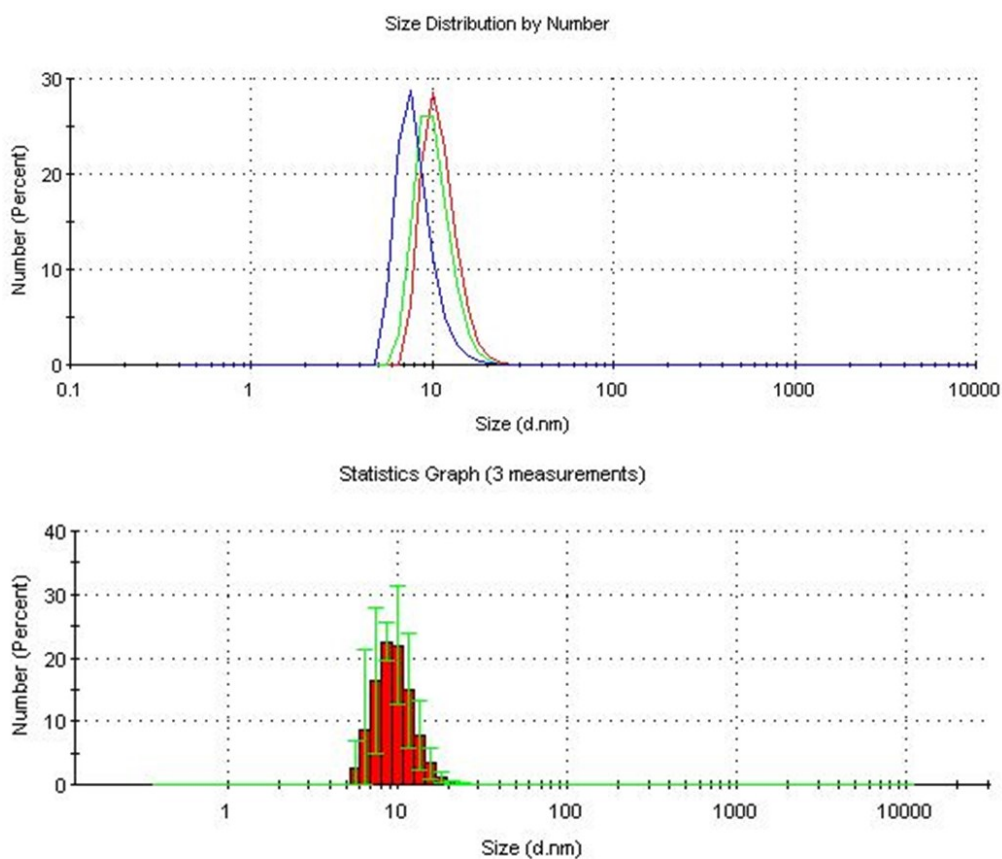

**Figure 36.** DLS of a freshly prepared  $4 \times 10^{-5} \text{M}$  water solution of **1**, measured after 5 minutes of sonication followed by 10 minutes stabilization at room temperature. Size distribution by number (up) and statistics graph for the three measurements (down).

## 8. Cartesian coordinates for the optimized structures

| General structure AAB |             |             |             | General structure BBA |             |             |             |
|-----------------------|-------------|-------------|-------------|-----------------------|-------------|-------------|-------------|
|                       |             |             |             | C                     | -5.57730961 | 1.40085494  | 0.05481000  |
| 0 1                   |             |             |             | C                     | -0.01447661 | 1.40965794  | -0.03300700 |
| C                     | -0.32454361 | 0.05070994  | 0.00000000  | C                     | 1.33203239  | 1.76466994  | -0.08705800 |
| C                     | 0.67656139  | -0.94559306 | -0.00851700 | C                     | 2.34050539  | 0.78724294  | -0.10906800 |
| C                     | -0.01505561 | -2.23294706 | 0.01413200  | C                     | 2.02488139  | -0.57151606 | -0.06425700 |
| N                     | 0.59950639  | -3.40987206 | 0.01709800  | C                     | 2.02492539  | -6.24825106 | 0.09486000  |
| C                     | -0.01507761 | -4.58679506 | 0.02016100  | C                     | 2.34065439  | -7.60707706 | 0.13757300  |
| C                     | 0.67655639  | -5.87416006 | 0.04098600  | C                     | 1.33219639  | -8.58448706 | 0.11516900  |
| C                     | -0.32454861 | -6.87048006 | 0.03207500  | C                     | -0.01439561 | -8.22944906 | 0.06285700  |
| C                     | -1.60495261 | -6.16887406 | 0.00734300  | C                     | -5.57733661 | -8.22054406 | -0.02578800 |
| N                     | -2.78141361 | -6.79160606 | -0.00155700 | C                     | -6.93136461 | -8.55248606 | -0.03212100 |
| C                     | -3.95611961 | -6.17114106 | -0.00359200 | C                     | -7.92580061 | -7.55644406 | -0.02615000 |
| C                     | -5.24086961 | -6.86686506 | -0.01338100 | C                     | -7.59139261 | -6.20311506 | -0.01362400 |
| C                     | -6.23698461 | -5.86919606 | -0.00736200 | O                     | 3.01508539  | -5.30220006 | 0.22157500  |
| C                     | -5.53955161 | -4.58552806 | 0.00613500  | O                     | 3.01517139  | -1.51750606 | -0.19059200 |
| N                     | -6.16106161 | -3.40985406 | 0.01617700  | C                     | 3.71520939  | -4.83736406 | -0.87459100 |
| C                     | -5.53954661 | -2.23419506 | 0.02667600  | C                     | 3.62250139  | -5.45627606 | -2.14339900 |
| C                     | -6.23696961 | -0.95050306 | 0.03809700  | C                     | 4.36999639  | -4.97462506 | -3.19120900 |
| C                     | -5.24084961 | 0.04715694  | 0.04434800  | C                     | 5.24219039  | -3.86995406 | -3.02449900 |
| C                     | -3.95609961 | -0.64859206 | 0.03677500  | C                     | 5.32446139  | -3.24272406 | -1.73714000 |
| N                     | -2.78139161 | -0.02812206 | 0.03470700  | C                     | 4.53417539  | -3.73934206 | -0.65475500 |
| C                     | -1.60492861 | -0.65086406 | 0.02643700  | C                     | 6.03021939  | -3.36952006 | -4.09540900 |
| N                     | -1.37043361 | -2.00018706 | 0.03252700  | C                     | 6.87021739  | -2.29575606 | -3.91433900 |
| N                     | -1.37046761 | -4.81953506 | 0.00242400  | C                     | 6.95553239  | -1.67575306 | -2.64414000 |
| N                     | -4.18654361 | -2.00290806 | 0.02699400  | C                     | 6.20405139  | -2.13425106 | -1.58624300 |
| N                     | -4.18656561 | -4.81683106 | 0.00714000  | C                     | 4.53372539  | -3.08040406 | 0.68671300  |
| Zn                    | -2.77726561 | -3.40989906 | 0.02252900  | C                     | 5.32332539  | -3.57697106 | 1.76961900  |
| C                     | -7.59138061 | -0.61655806 | 0.04218100  | C                     | 5.24026939  | -2.94967306 | 3.05689400  |
| C                     | -7.92578261 | 0.73678794  | 0.05291400  | C                     | 3.71460139  | -1.98239106 | 0.90599200  |
| C                     | -6.93133861 | 1.73282194  | 0.05911400  | C                     | 3.62119239  | -1.36335106 | 2.17469000  |
| C                     | 4.36803739  | -1.84493906 | 3.22299100  | H                     | -8.35135361 | -1.39078706 | 0.03711400  |
| C                     | 6.20298439  | -4.68547306 | 1.61933000  | H                     | -8.97102961 | 1.03135394  | 0.05648200  |
| C                     | 6.95378139  | -5.14394706 | 2.67772000  | H                     | -7.22766461 | 2.77755394  | 0.06724100  |
| C                     | 6.86768139  | -4.52388506 | 3.94783900  | H                     | -4.80460161 | 2.16238494  | 0.05921500  |
| C                     | 6.02760739  | -3.45008306 | 4.12832500  | H                     | -0.80218961 | 2.15486694  | -0.02628200 |

|   |             |             |             |    |             |             |             |
|---|-------------|-------------|-------------|----|-------------|-------------|-------------|
| H | 1.61432339  | 2.81245894  | -0.12316700 | C  | -5.40527860 | -1.04015595 | 0.06900200  |
| H | 3.38514239  | 1.07310694  | -0.17475600 | C  | -4.40615860 | -0.04239295 | 0.08233300  |
| H | 3.38536339  | -7.89298206 | 0.20193300  | C  | -3.12441460 | -0.74202095 | 0.03969100  |
| H | 1.61451439  | -9.63232506 | 0.14961400  | N  | -1.94928260 | -0.11936695 | 0.03956200  |
| H | -0.80205861 | -8.97470806 | 0.05580200  | C  | -0.77443860 | -0.74154095 | 0.02004000  |
| H | -4.80463661 | -8.98208306 | -0.03009100 | N  | -0.54115660 | -2.09201195 | 0.01300800  |
| H | -7.22769361 | -9.59720506 | -0.04171200 | N  | -0.54114360 | -4.91073695 | -0.03972900 |
| H | -8.97104661 | -7.85099006 | -0.03135200 | N  | -3.35727260 | -2.09180095 | 0.00438900  |
| H | -8.35135961 | -5.42887806 | -0.00881000 | N  | -3.35727960 | -4.91093495 | -0.03035600 |
| H | 2.96081639  | -6.30345706 | -2.28065300 | Zn | -1.94885360 | -3.50133795 | -0.01572400 |
| H | 4.29825939  | -5.44608706 | -4.16776900 | C  | -6.75427060 | -0.67131395 | 0.13173500  |
| H | 5.95588439  | -3.85502106 | -5.06530100 | C  | -7.07376860 | 0.68527405  | 0.20608600  |
| H | 7.62287939  | -0.83002206 | -2.50438100 | C  | -6.06731560 | 1.66499905  | 0.20555200  |
| H | 6.27851639  | -1.65633406 | -0.61534300 | C  | -4.71964160 | 1.31457505  | 0.14439700  |
| H | 2.95952939  | -0.51606606 | 2.31143000  | C  | 0.81856840  | 1.31794805  | -0.01899700 |
| H | 4.29578539  | -1.37335506 | 4.19945400  | C  | 2.16599240  | 1.67161905  | -0.06833700 |
| H | 6.27804639  | -5.16343806 | 0.64849900  | C  | 3.17308840  | 0.69351205  | -0.09902600 |
| H | 7.62119139  | -5.98970506 | 2.53842200  | C  | 2.85575140  | -0.66562495 | -0.06799000 |
| H | 5.95268339  | -2.96452606 | 5.09814400  | C  | 2.85569540  | -6.33714895 | 0.04439400  |
| H | 7.46872439  | -1.92235806 | -4.73994500 | C  | 3.17295140  | -7.69626395 | 0.07685600  |
| H | 7.46564839  | -4.89726806 | 4.77384300  | C  | 2.16584740  | -8.67437195 | 0.04651000  |

### General structure (AA)<sub>2</sub>

O 1

|   |             |             |             |   |             |             |             |
|---|-------------|-------------|-------------|---|-------------|-------------|-------------|
| C | 0.50709940  | -0.04056795 | 0.00000000  | C | 0.81847440  | -8.32068895 | -0.00395200 |
| C | 1.50682040  | -1.03758495 | -0.01769000 | C | -4.71975460 | -8.31738195 | -0.16802200 |
| C | 0.81359740  | -2.32471795 | -0.00700600 | C | -6.06747260 | -8.66779595 | -0.22833200 |
| N | 1.42857940  | -3.50137395 | -0.01302200 | C | -7.07391260 | -7.68805195 | -0.22905200 |
| C | 0.81358540  | -4.67804195 | -0.01911800 | C | -6.75431460 | -6.33143395 | -0.15569000 |
| C | 1.50680440  | -5.96516495 | -0.00705900 | O | 3.84386940  | -5.39081895 | 0.17805500  |
| C | 0.50706840  | -6.96217995 | -0.02444500 | O | 3.84375240  | -1.61205795 | -0.20202000 |
| C | -0.77444760 | -6.26121795 | -0.04574700 | C | 4.54727740  | -4.92045095 | -0.91428000 |
| N | -1.94929360 | -6.88338195 | -0.06491400 | C | 4.45449840  | -5.53029495 | -2.18737600 |
| C | -3.12442660 | -6.26074095 | -0.06522100 | C | 5.20396540  | -5.04256895 | -3.23101800 |
| C | -4.40618560 | -6.96038595 | -0.10701500 | C | 6.07786440  | -3.94061295 | -3.05566800 |
| C | -5.40528560 | -5.96260895 | -0.09384800 | C | 6.16018740  | -3.32272095 | -1.76380800 |
| C | -4.71192060 | -4.67731195 | -0.04325300 | C | 5.36811640  | -3.82577195 | -0.68567800 |
| N | -5.32715160 | -3.50136395 | -0.01280900 | C | 6.86756940  | -3.43386095 | -4.12238600 |
| C | -4.71192260 | -2.32543695 | 0.01756900  | C | 7.70915040  | -2.36281395 | -3.93290100 |
|   |             |             |             | C | 7.79450440  | -1.75205195 | -2.65823300 |
|   |             |             |             | C | 7.04147140  | -2.21683095 | -1.60418900 |



|    |             |             |             |   |             |             |             |
|----|-------------|-------------|-------------|---|-------------|-------------|-------------|
| C  | -1.17725700 | 0.01543400  | 2.76634500  | C | -7.29103500 | 3.23611400  | 1.53382400  |
| N  | -0.00012800 | -0.00013000 | 3.38842900  | C | -8.20625900 | 3.03232700  | 0.46799300  |
| C  | 1.17701600  | -0.01568500 | 2.76637400  | C | -8.26787600 | 1.73698300  | -0.15059200 |
| C  | 2.47019700  | -0.03693700 | 3.45780400  | C | -7.42866100 | 0.67813100  | 0.32105800  |
| C  | 3.46129600  | -0.03135800 | 2.44988900  | C | -9.04095000 | 4.07907500  | 0.00644100  |
| C  | 2.75647000  | -0.01145300 | 1.17468800  | C | -9.92417000 | 3.89565700  | -1.05262100 |
| N  | 3.37108100  | -0.00007700 | 0.00000000  | C | -9.97624100 | 2.60665400  | -1.67211900 |
| C  | 2.75649800  | 0.01128200  | -1.17470200 | C | -9.18261200 | 1.57432000  | -1.23361700 |
| C  | 3.46135500  | 0.03118700  | -2.44988500 | C | -7.42867600 | -0.67831500 | -0.32132500 |
| C  | 2.47028100  | 0.03673300  | -3.45782400 | C | -8.26793700 | -1.73713700 | 0.15030800  |
| C  | 1.17708400  | 0.01547200  | -2.76642600 | C | -8.20634300 | -3.03248700 | -0.46826500 |
| N  | -0.00004400 | -0.00010500 | -3.38851000 | C | -6.55989200 | -0.93737400 | -1.38203000 |
| C  | -1.17718800 | -0.01568100 | -2.76645500 | C | -6.48540800 | -2.21945300 | -1.98179000 |
| N  | -1.40477400 | -0.00587900 | -1.41398600 | C | -7.29109600 | -3.23630900 | -1.53407000 |
| N  | -1.40480900 | 0.00563800  | 1.41387000  | C | -9.18269800 | -1.57443700 | 1.23330800  |
| N  | 1.40463700  | 0.00567600  | -1.41395100 | C | -9.97636800 | -2.60674400 | 1.67179700  |
| N  | 1.40460200  | -0.00586800 | 1.41390400  | C | -9.92431900 | -3.89575300 | 1.05231100  |
| Zn | -0.00008600 | -0.00010900 | -0.00004100 | C | -9.04107500 | -4.07920800 | -0.00672500 |
| C  | 4.81839600  | 0.02628500  | -2.79541000 | O | 5.79118400  | -0.11364000 | -1.81755300 |
| C  | 5.15906300  | 0.03149000  | -4.14802800 | O | 5.79113000  | 0.11354500  | 1.81760900  |
| C  | 4.16328500  | 0.05214700  | -5.14001600 | C | 6.55971000  | 0.93725300  | -1.38186900 |
| C  | 2.80797500  | 0.05156500  | -4.81046500 | C | 6.48518900  | 2.21932600  | -1.98163600 |
| C  | -2.80803200 | -0.05178500 | -4.81053400 | C | 7.29081900  | 3.23621900  | -1.53389500 |
| C  | -4.16333500 | -0.05236200 | -5.14011500 | C | 8.20603900  | 3.03244300  | -0.46805900 |
| C  | -5.15913600 | -0.03168700 | -4.14815100 | C | 8.26767000  | 1.73709800  | 0.15052200  |
| C  | -4.81850000 | -0.02647300 | -2.79552600 | C | 7.42847300  | 0.67823600  | -0.32113600 |
| C  | -4.81857000 | 0.02621000  | 2.79532600  | C | 9.04071300  | 4.07920100  | -0.00649800 |
| C  | -5.15923900 | 0.03141400  | 4.14794300  | C | 9.97601100  | 2.60678600  | 1.67206400  |
| C  | -4.16346300 | 0.05208100  | 5.13993200  | C | 9.18240200  | 1.57444300  | 1.23355300  |
| C  | -2.80815200 | 0.05151000  | 4.81038500  | C | 7.42851600  | -0.67821300 | 0.32124000  |
| C  | 2.80786100  | -0.05178800 | 4.81045300  | C | 8.26780400  | -1.73701300 | -0.15039400 |
| C  | 4.16316400  | -0.05235200 | 5.14003400  | C | 8.20625600  | -3.03236100 | 0.46818800  |
| C  | 5.15896500  | -0.03165500 | 4.14807000  | C | 6.55974300  | -0.93729400 | 1.38195000  |
| C  | 4.81832900  | -0.02643300 | 2.79544500  | C | 6.48530100  | -2.21937300 | 1.98171600  |
| O  | -5.79135400 | -0.11372500 | 1.81746600  | C | 7.29102000  | -3.23620500 | 1.53399900  |
| O  | -5.79130500 | 0.11348500  | -1.81769000 | C | 9.18255100  | -1.57429100 | -1.23340300 |
| C  | -6.55989700 | 0.93715800  | 1.38178800  | C | 9.97625100  | -2.60657500 | -1.67189000 |
| C  | -6.48539000 | 2.21923100  | 1.98155800  | H | 6.20780300  | 0.00477900  | -4.42539800 |

|   |              |             |             |   |             |              |              |
|---|--------------|-------------|-------------|---|-------------|--------------|--------------|
| H | 4.46317800   | 0.05700700  | -6.18315500 | C | 12.67465700 | -7.05712600  | -3.71135700  |
| H | 2.03882400   | 0.05628100  | -5.57469800 | C | 13.24480700 | -9.17355100  | -1.98355600  |
| H | -2.03886400  | -0.05651000 | -5.57474900 | H | 12.19332100 | -8.06034300  | -0.48834600  |
| H | -4.46320300  | -0.05722900 | -6.18326200 | C | 13.38119800 | -8.16525700  | -4.17450400  |
| H | -6.20786900  | -0.00496800 | -4.42554700 | H | 12.44024300 | -6.25656800  | -4.40392300  |
| H | -6.20797900  | 0.00469500  | 4.42531200  | C | 13.67009200 | -9.24560700  | -3.32194100  |
| H | -4.46335700  | 0.05694000  | 6.18307100  | C | 15.02995900 | -7.68595800  | -5.82201800  |
| H | -2.03900200  | 0.05623400  | 5.57461900  | C | 15.10459600 | -7.55933200  | -7.35142100  |
| H | 2.03869300   | -0.05653100 | 5.57466800  | H | 15.14201200 | -6.70087400  | -5.34895000  |
| H | 4.46303200   | -0.05722400 | 6.18318100  | H | 15.82581300 | -8.33985900  | -5.43860800  |
| H | 6.20769700   | -0.00492600 | 4.42546700  | C | 16.44443800 | -6.95270800  | -7.77486600  |
| H | -5.78753800  | 2.38762800  | 2.79304200  | H | 14.96282400 | -8.55470900  | -7.78332300  |
| H | -7.22951400  | 4.21689600  | 1.99687400  | H | 14.26383600 | -6.93725500  | -7.67175800  |
| H | -8.97590500  | 5.04916800  | 0.49025200  | H | 16.58356300 | -5.96885100  | -7.31847800  |
| H | -10.65942700 | 2.45141700  | -2.50079100 | H | 17.27692500 | -7.58778200  | -7.45972400  |
| H | -9.24652300  | 0.60693700  | -1.72015800 | C | 13.48907200 | -11.38295300 | -4.28833900  |
| H | -5.78753900  | -2.38787800 | -2.79325400 | C | 14.36599200 | -12.54132700 | -4.78619800  |
| H | -7.22959100  | -4.21709700 | -1.99711000 | H | 12.82027000 | -11.72077100 | -3.48615600  |
| H | -9.24659200  | -0.60704800 | 1.71983800  | H | 12.87467800 | -10.98388000 | -5.10583100  |
| H | -10.65957100 | -2.45148000 | 2.50045000  | C | 13.47699300 | -13.66458800 | -5.32985200  |
| H | -8.97604400  | -5.04930800 | -0.49052400 | H | 15.03803400 | -12.15413900 | -5.55801000  |
| H | 5.78734100   | 2.38771700  | -2.79312400 | H | 14.98270400 | -12.88728600 | -3.95113000  |
| H | 7.22928900   | 4.21700100  | -1.99694500 | H | 12.80369200 | -14.03337600 | -4.55132500  |
| H | 8.97566000   | 5.04929400  | -0.49030800 | H | 12.86128200 | -13.30147700 | -6.15720100  |
| H | 10.65919400  | 2.45155700  | 2.50074100  | C | 14.70272900 | -10.14667500 | -0.37919500  |
| H | 9.24632300   | 0.60705900  | 1.72008900  | C | 14.63003100 | -11.20295900 | 0.73406200   |
| H | 5.78744200   | -2.38781600 | 2.79318400  | H | 15.56852200 | -10.31946000 | -1.03384700  |
| H | 7.22955100   | -4.21699100 | 1.99704800  | H | 14.79872300 | -9.14118100  | 0.05232700   |
| H | 9.24640900   | -0.60690400 | -1.71994200 | C | 15.88795000 | -11.14708800 | 1.60463900   |
| H | 10.65944100  | -2.45129600 | -2.50055200 | H | 13.72801100 | -11.00356100 | 1.31981500   |
| C | 9.04102300   | -4.07905500 | 0.00665400  | H | 14.51110800 | -12.18536200 | 0.26699100   |
| H | 8.97603200   | -5.04915300 | 0.49046500  | H | 16.78163600 | -11.35957100 | 1.01146400   |
| C | 9.92392800   | 3.89579100  | 1.05256900  | H | 16.00779800 | -10.15336000 | 2.04479500   |
| C | 9.92425300   | -3.89558100 | -1.05239000 | O | 13.74753700 | -8.23601200  | -5.51182700  |
| C | 10.74753000  | -4.96862200 | -1.51582500 | O | 14.35712400 | -10.35396800 | -3.79100900  |
| C | 11.44056000  | -5.89114300 | -1.91320100 | O | 13.49019500 | -10.24241500 | -1.13139100  |
| C | 12.21888700  | -6.99427500 | -2.37658200 | C | 16.57944900 | -8.03422700  | -10.03813200 |
| C | 12.53297900  | -8.07028000 | -1.51793800 | H | 17.31348700 | -8.72530900  | -9.62261100  |



|   |             |              |              |   |             |             |             |
|---|-------------|--------------|--------------|---|-------------|-------------|-------------|
| H | 15.57597600 | -8.44832400  | -9.95749500  | C | 11.44006900 | 5.89146000  | 1.91342500  |
| H | 16.81078000 | -7.83908900  | -11.08552300 | C | 12.21836300 | 6.99461400  | 2.37681500  |
| C | 18.02613000 | -6.13360000  | -9.47608100  | C | 12.53249800 | 8.07059100  | 1.51815200  |
| H | 18.18886100 | -5.96884700  | -10.54125900 | C | 12.67401200 | 7.05753400  | 3.71162600  |
| H | 18.08093600 | -5.18532000  | -8.94124000  | C | 13.24429200 | 9.17388200  | 1.98377700  |
| H | 18.77412600 | -6.82650700  | -9.09031600  | H | 12.19288600 | 8.06060600  | 0.48854400  |
| C | 15.62386900 | -5.77323000  | -9.83435400  | C | 13.38051700 | 8.16568700  | 4.17478100  |
| H | 14.63206600 | -6.21527400  | -9.75876200  | H | 12.43951300 | 6.25701200  | 4.40420700  |
| H | 15.66835200 | -4.84181800  | -9.26921600  | C | 13.66950200 | 9.24598800  | 3.32218500  |
| H | 15.85991300 | -5.58166000  | -10.88129900 | O | 13.48978700 | 10.24274000 | 1.13162900  |
| C | 15.00188300 | -15.58799200 | -4.79669200  | O | 13.74677300 | 8.23655900  | 5.51211800  |
| H | 15.42286700 | -16.50700700 | -5.20518800  | O | 14.35660700 | 10.35429600 | 3.79123300  |
| H | 15.80699300 | -14.92729800 | -4.47998100  | C | 14.70191100 | 10.14648500 | 0.37884000  |
| H | 14.34842800 | -15.82458300 | -3.95646100  | C | 15.02878600 | 7.68571600  | 5.82258100  |
| C | 15.08583300 | -14.56631500 | -7.03532000  | C | 13.48867400 | 11.38346800 | 4.28836100  |
| H | 15.50403700 | -15.48932200 | -7.43764900  | C | 14.62933700 | 11.20308800 | -0.73411800 |
| H | 14.49328700 | -14.06628900 | -7.80203200  | H | 15.56810700 | 10.31860700 | 1.03313800  |
| H | 15.89195400 | -13.91963000 | -6.69324300  | H | 14.79713400 | 9.14104200  | -0.05297200 |
| C | 13.12651600 | -15.87777300 | -6.35366800  | C | 15.10330500 | 7.55968600  | 7.35203700  |
| H | 12.48095400 | -16.14253200 | -5.51613300  | H | 15.14016200 | 6.70035600  | 5.34992800  |
| H | 12.54327600 | -15.40146500 | -7.14188400  | H | 15.82512000 | 8.33888900  | 5.43892100  |
| H | 13.61509200 | -16.77139300 | -6.74230500  | C | 14.36575700 | 12.54171400 | 4.78623400  |
| C | 14.82029700 | -11.86383600 | 3.76131400   | H | 12.82003000 | 11.72134700 | 3.48607100  |
| H | 14.86132500 | -10.82231600 | 4.08140100   | H | 12.87410700 | 10.98457900 | 5.10581400  |
| H | 13.86652000 | -12.07550500 | 3.28138200   | C | 15.88687000 | 11.14671400 | -1.60522300 |
| H | 14.95014000 | -12.51994900 | 4.62221900   | H | 13.72696100 | 11.00435600 | -1.31955000 |
| C | 17.26172100 | -11.90429700 | 3.50342800   | H | 14.51117500 | 12.18544100 | -0.26674700 |
| H | 17.31903400 | -12.58897200 | 4.34968000   | C | 16.44271800 | 6.95229900  | 7.77574800  |
| H | 18.08020700 | -12.10227600 | 2.81111100   | H | 14.96223400 | 8.55534800  | 7.78351000  |
| H | 17.30838300 | -10.87386600 | 3.85602200   | H | 14.26210400 | 6.93833700  | 7.67263000  |
| C | 15.88412300 | -13.55477200 | 2.32015600   | C | 13.47692500 | 13.66516700 | 5.32975600  |
| H | 14.91737100 | -13.74517100 | 1.85742900   | H | 15.03766300 | 12.15443600 | 5.55811800  |
| H | 16.69068300 | -13.72861300 | 1.60719600   | H | 14.98260300 | 12.88751500 | 3.95119900  |
| H | 16.01056500 | -14.20800900 | 3.18381700   | H | 16.78091800 | 11.35851900 | -1.01235100 |
| N | 16.64904500 | -6.73218200  | -9.27830800  | H | 16.00595800 | 10.15303100 | -2.04568700 |
| N | 14.18842000 | -14.91006500 | -5.87183200  | N | 15.94388900 | 12.12093400 | -2.78747900 |
| N | 15.94487800 | -12.12103500 | 2.78712600   | H | 16.58113000 | 5.96813000  | 7.31981600  |
| C | 10.74711000 | 4.96889500   | 1.51603000   | H | 17.27565500 | 7.58663000  | 7.46029900  |

|   |             |             |             |   |              |             |             |
|---|-------------|-------------|-------------|---|--------------|-------------|-------------|
| N | 16.64718800 | 6.73232400  | 9.27929000  | H | 12.54337700  | 15.40230500 | 7.14161700  |
| H | 12.80376500 | 14.03405000 | 4.55115100  | H | 13.61550400  | 16.77200600 | 6.74209100  |
| H | 12.86107000 | 13.30221600 | 6.15706800  | C | -10.74736800 | 4.96875600  | -1.51606800 |
| N | 14.18854600 | 14.91053200 | 5.87174300  | C | -11.44033500 | 5.89132300  | -1.91344500 |
| C | 14.81876900 | 11.86463700 | -3.76128300 | C | -12.21863500 | 6.99448500  | -2.37681300 |
| C | 17.26031900 | 11.90361700 | -3.50436400 | C | -12.53282100 | 8.07041000  | -1.51810400 |
| C | 15.88415500 | 13.55458500 | -2.32011500 | C | -12.67420700 | 7.05748200  | -3.71164500 |
| C | 16.57856800 | 8.03477400  | 10.03850800 | C | -13.24461100 | 9.17371500  | -1.98370200 |
| C | 18.02383300 | 6.13281900  | 9.47731900  | H | -12.19324900 | 8.06037700  | -0.48848400 |
| C | 15.62131200 | 5.77439000  | 9.83579800  | C | -13.38071700 | 8.16564700  | -4.17477000 |
| C | 15.00224000 | 15.58824900 | 4.79664700  | H | -12.43962300 | 6.25701400  | -4.40426100 |
| C | 15.08578600 | 14.56665800 | 7.03532800  | C | -13.66978000 | 9.24588600  | -3.32212000 |
| C | 13.12678800 | 15.87846800 | 6.35344000  | O | -13.49017200 | 10.24252400 | -1.13151100 |
| H | 14.85908100 | 10.82318200 | -4.08167400 | O | -13.74692600 | 8.23665500  | -5.51211400 |
| H | 13.86530500 | 12.07670900 | -3.28090500 | O | -14.35693600 | 10.35417300 | -3.79111800 |
| H | 14.94863200 | 12.52091400 | -4.62205900 | C | -14.70227000 | 10.14614800 | -0.37869700 |
| H | 17.31768600 | 12.58847100 | -4.35046800 | C | -15.02845500 | 7.68484400  | -5.82284200 |
| H | 18.07919700 | 12.10095000 | -2.81232600 | C | -13.48908200 | 11.38349200 | -4.28806300 |
| H | 17.30624500 | 10.87324800 | -3.85723500 | C | -14.62977500 | 11.20275900 | 0.73425800  |
| H | 14.91769400 | 13.74542900 | -1.85696400 | H | -15.56849700 | 10.31818200 | -1.03297600 |
| H | 16.69109300 | 13.72777000 | -1.60742400 | H | -14.79738200 | 9.14069500  | 0.05311600  |
| H | 16.01064300 | 14.20797000 | -3.18365700 | C | -15.10291900 | 7.55956200  | -7.35236000 |
| H | 17.31309500 | 8.72512700  | 9.62264000  | H | -15.13896300 | 6.69913800  | -5.35070500 |
| H | 15.57539400 | 8.44956400  | 9.95771000  | H | -15.82535700 | 8.33711200  | -5.43881800 |
| H | 16.80978900 | 7.83995600  | 11.08598200 | C | -14.36627900 | 12.54156100 | -4.78614800 |
| H | 18.18645700 | 5.96843400  | 10.54257000 | H | -12.82067300 | 11.72150700 | -3.48563400 |
| H | 18.07793300 | 5.18425400  | 8.94291100  | H | -12.87426400 | 10.98470900 | -5.10538100 |
| H | 18.77233500 | 6.82499800  | 9.09122500  | C | -15.88727700 | 11.14625900 | 1.60539800  |
| H | 14.62983300 | 6.21712400  | 9.76000000  | H | -13.72736300 | 11.00412000 | 1.31966700  |
| H | 15.66510900 | 4.84267600  | 9.27110500  | H | -14.51172500 | 12.18512100 | 0.26688000  |
| H | 15.85722000 | 5.58314500  | 10.88283400 | C | -16.44179800 | 6.95117200  | -7.77632300 |
| H | 15.42335700 | 16.50720700 | 5.20513500  | H | -14.96278600 | 8.55558400  | -7.78330800 |
| H | 15.80725600 | 14.92738600 | 4.48004800  | H | -14.26116500 | 6.93915300  | -7.67332300 |
| H | 14.34891100 | 15.82491900 | 3.95634100  | C | -13.47755500 | 13.66513600 | -5.32959200 |
| H | 15.50414100 | 15.48960000 | 7.43764800  | H | -15.03797600 | 12.15411600 | -5.55813000 |
| H | 14.49307100 | 14.06679000 | 7.80201200  | H | -14.98333700 | 12.88729400 | -3.95124300 |
| H | 15.89180700 | 13.91979300 | 6.69335500  | H | -16.78136500 | 11.35795500 | 1.01254800  |
| H | 12.48135900 | 16.14332500 | 5.51583300  | H | -16.00624300 | 10.15256900 | 2.04588100  |

|   |              |             |              |   |              |              |             |
|---|--------------|-------------|--------------|---|--------------|--------------|-------------|
| N | -15.94436900 | 12.12048900 | 2.78764100   | H | -14.49373700 | 14.06650800  | -7.80186100 |
| H | -16.57924800 | 5.96660600  | -7.32095900  | H | -15.89246700 | 13.91945400  | -6.69320500 |
| H | -17.27530100 | 7.58453800  | -7.46043100  | H | -12.48223200 | 16.14336600  | -5.51579000 |
| N | -16.64618700 | 6.73189400  | -9.27997700  | H | -12.54420200 | 15.40230100  | -7.14155500 |
| H | -12.80450600 | 14.03411700 | -4.55093700  | H | -13.61645500 | 16.77190800  | -6.74204700 |
| H | -12.86158600 | 13.30226600 | -6.15685400  | C | -10.74755500 | -4.96882400  | 1.51575800  |
| N | -14.18930400 | 14.91040000 | -5.87164400  | C | -11.44053000 | -5.89137400  | 1.91316000  |
| C | -14.81916700 | 11.86435600 | 3.76139400   | C | -12.21883500 | -6.99449800  | 2.37660900  |
| C | -17.26073600 | 11.90301000 | 3.50459200   | C | -12.53302100 | -8.07049900  | 1.51799600  |
| C | -15.88484600 | 13.55414100 | 2.32025300   | C | -12.67443300 | -7.05736400  | 3.71143900  |
| C | -16.57888800 | 8.03486000  | -10.03842500 | C | -13.24482600 | -9.17375400  | 1.98369000  |
| C | -18.02227500 | 6.13118500  | -9.47824000  | H | -12.19344400 | -8.06055900  | 0.48837600  |
| C | -15.61944100 | 5.77527600  | -9.83714400  | C | -13.38093200 | -8.16549200  | 4.17466900  |
| C | -15.00307500 | 15.58808800 | -4.79658600  | H | -12.43987900 | -6.25682600  | 4.40398400  |
| C | -15.08650400 | 14.56637100 | -7.03521400  | C | -13.66998200 | -9.24581200  | 3.32211700  |
| C | -13.12764800 | 15.87842600 | -6.35338100  | O | -13.49040300 | -10.24264400 | 1.13159800  |
| H | -14.85932600 | 10.82290000 | 4.08180200   | O | -13.74711100 | -8.23632300  | 5.51202400  |
| H | -13.86575600 | 12.07654700 | 3.28096700   | O | -14.35710200 | -10.35406400 | 3.79126200  |
| H | -14.94907600 | 12.52062800 | 4.62216800   | C | -14.70241000 | -10.14622500 | 0.37864000  |
| H | -17.31815600 | 12.58787400 | 4.35068500   | C | -15.02903500 | -7.68532800  | 5.82256800  |
| H | -18.07967300 | 12.10022000 | 2.81258800   | C | -13.48917700 | -11.38353400 | 4.28778100  |
| H | -17.30650700 | 10.87264200 | 3.85748500   | C | -14.62992400 | -11.20298000 | -0.73417800 |
| H | -14.91843300 | 13.74510500 | 1.85705000   | H | -15.56872500 | -10.31808000 | 1.03285000  |
| H | -16.69184200 | 13.72721000 | 1.60760000   | H | -14.79736600 | -9.14081500  | -0.05330600 |
| H | -16.01137500 | 14.20752300 | 3.18379100   | C | -15.10349500 | -7.55942700  | 7.35203800  |
| H | -17.31403600 | 8.72426300  | -9.62207800  | H | -15.14028900 | -6.69990800  | 5.35000700  |
| H | -15.57610300 | 8.45055900  | -9.95747300  | H | -15.82547200 | -8.33835400  | 5.43887200  |
| H | -16.81001800 | 7.84044300  | -11.08599500 | C | -14.36632000 | -12.54143300 | 4.78635400  |
| H | -18.18483600 | 5.96728000  | -10.54357500 | H | -12.82124700 | -11.72168200 | 3.48501100  |
| H | -18.07541300 | 5.18225000  | -8.94439500  | H | -12.87386100 | -10.98484200 | 5.10476900  |
| H | -18.77140500 | 6.82241400  | -9.09166500  | C | -15.88735000 | -11.14646400 | -1.60542800 |
| H | -14.62838000 | 6.21891500  | -9.76116100  | H | -13.72744200 | -11.00450300 | -1.31953500 |
| H | -15.66229700 | 4.84318300  | -9.27300500  | H | -14.51201300 | -12.18529800 | -0.26667100 |
| H | -15.85525200 | 5.58443300  | -10.88427500 | C | -16.44279600 | -6.95185900  | 7.77584100  |
| H | -15.42431300 | 16.50696400 | -5.20513400  | H | -14.96257500 | -8.55515200  | 7.78341300  |
| H | -15.80800600 | 14.92714700 | -4.47993400  | H | -14.26218300 | -6.93824500  | 7.67266300  |
| H | -14.34976800 | 15.82489700 | -3.95630300  | C | -13.47751300 | -13.66512600 | 5.32941900  |
| H | -15.50493800 | 15.48925000 | -7.43759700  | H | -15.03756700 | -12.15383700 | 5.55865100  |

|   |              |              |             |   |              |              |            |
|---|--------------|--------------|-------------|---|--------------|--------------|------------|
| H | -14.98385300 | -12.88710600 | 3.95177300  | H | -15.80852400 | -14.92684000 | 4.48087900 |
| H | -16.78150300 | -11.35802100 | -1.01262800 | H | -14.35066000 | -15.82485200 | 3.95665500 |
| H | -16.00619500 | -10.15281200 | -2.04602700 | H | -15.50418200 | -15.48882900 | 7.43846200 |
| N | -15.94443100 | -12.12081900 | -2.78757000 | H | -14.49263300 | -14.06618900 | 7.80216400 |
| H | -16.58104700 | -5.96761600  | 7.32002000  | H | -15.89185300 | -13.91903400 | 6.69413800 |
| H | -17.27584700 | -7.58601300  | 7.46033700  | H | -12.48245700 | -16.14348000 | 5.51530800 |
| N | -16.64719900 | -6.73201800  | 9.27941100  | H | -12.54359500 | -15.40232600 | 7.14106300 |
| H | -12.80489100 | -14.03424500 | 4.55046100  | H | -13.61622100 | -16.77180100 | 6.74210200 |
| H | -12.86109500 | -13.30231300 | 6.15637100  |   |              |              |            |
| N | -14.18919700 | -14.91025500 | 5.87186500  |   |              |              |            |
| C | -14.81915400 | -11.86486400 | -3.76128300 |   |              |              |            |
| C | -17.26074100 | -11.90333100 | -3.50462500 |   |              |              |            |
| C | -15.88503200 | -13.55442400 | -2.32002200 |   |              |              |            |
| C | -16.57880000 | -8.03456700  | 10.03847700 |   |              |              |            |
| C | -18.02373400 | -6.13228900  | 9.47753200  |   |              |              |            |
| C | -15.62114200 | -5.77433200  | 9.83601100  |   |              |              |            |
| C | -15.00355500 | -15.58788600 | 4.79721400  |   |              |              |            |
| C | -15.08581500 | -14.56603100 | 7.03582300  |   |              |              |            |
| C | -13.12746100 | -15.87840700 | 6.35317400  |   |              |              |            |
| H | -14.85922500 | -10.82344100 | -4.08180500 |   |              |              |            |
| H | -13.86578500 | -12.07706700 | -3.28077600 |   |              |              |            |
| H | -14.94905500 | -12.52122100 | -4.62199300 |   |              |              |            |
| H | -17.31815100 | -12.58828000 | -4.35065000 |   |              |              |            |
| H | -18.07973300 | -12.10041500 | -2.81265200 |   |              |              |            |
| H | -17.30642300 | -10.87299700 | -3.85763000 |   |              |              |            |
| H | -14.91866000 | -13.74540000 | -1.85673900 |   |              |              |            |
| H | -16.69208300 | -13.72736200 | -1.60740000 |   |              |              |            |
| H | -16.01155100 | -14.20789100 | -3.18349700 |   |              |              |            |
| H | -17.31346600 | -8.72473700  | 9.62254900  |   |              |              |            |
| H | -15.57570500 | -8.44953200  | 9.95760500  |   |              |              |            |
| H | -16.80995800 | -7.83982700  | 11.08598000 |   |              |              |            |
| H | -18.18631400 | -5.96800400  | 10.54280500 |   |              |              |            |
| H | -18.07766900 | -5.18364900  | 8.94324100  |   |              |              |            |
| H | -18.77236600 | -6.82428500  | 9.09136300  |   |              |              |            |
| H | -14.62974500 | -6.21723900  | 9.76015100  |   |              |              |            |
| H | -15.66477600 | -4.84254800  | 9.27142000  |   |              |              |            |
| H | -15.85700200 | -5.58315900  | 10.88307100 |   |              |              |            |
| H | -15.42475300 | -16.50667000 | 5.20600900  |   |              |              |            |

## 9. References

- 1 A. Ogunsipe, D. Maree, T. Nyokong, Solvent effects on the photochemical and fluorescence properties of zinc phthalocyanine derivatives, *J. Mol. Struct.*, 2003, **650**, 131–140
- 2 M. Revuelta-Maza, T. Torres and G. de la Torre, Synthesis and Aggregation Studies of Functional Binaphthyl-Bridged Chiral Phthalocyanines, *Org. Lett.*, 2019, **21**, 8183–8186.
- 3 I. Paramio, A. Salazar, M. Jordà-Redondo, S. Nonell, T. Torres and G. de la Torre, Nanostructured AABB Zn(II) Phthalocyanines as Photodynamic Agents for Bacterial Inactivation, *Adv. Ther.*, 2023, 2300116.
